# Supplementary material for: Loss of ANCO1 Expression Regulates Chromatin Accessibility and Drives Progression of Early-Stage Triple-Negative Breast Cancer
Source: MDPI journal article supplement (doi:10.3390/ijms241411505), 2023-07-15
Supplement: s1 [file s1]

Figure S3

**A**

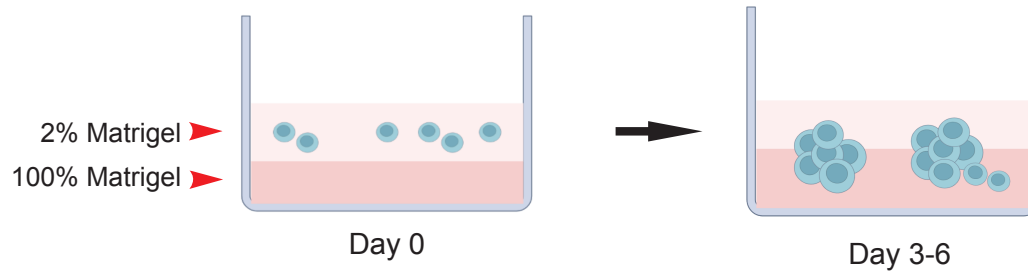

**B**

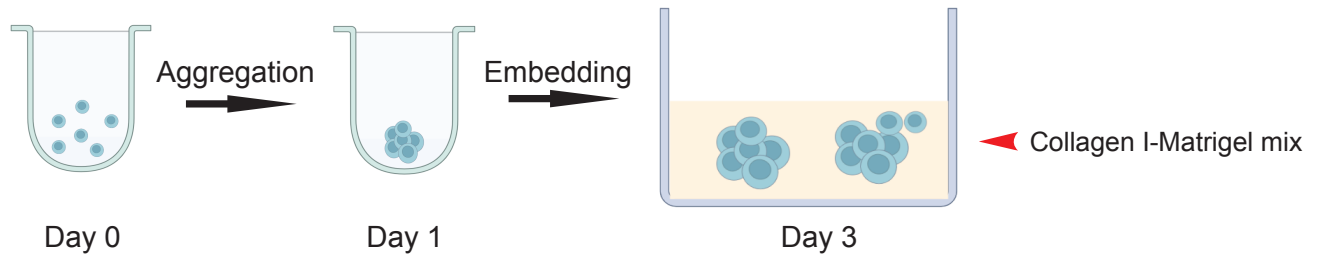

Figure s3:(A) A schematic illustrating 3D culture system of spheres in Matrigel. Culture slide chambers were first coated with 100% Matrigel. Cells were suspended in 2% Matrigel and plated on top of pure Matrigel layer to form spheres. (B) A schematic illustrating 3D culture system of spheres that were aggregated in U-shaped wells and then embedded in a Matrigel and Collagen I mixture.
