# Supplementary material for: Loss of ANCO1 Expression Regulates Chromatin Accessibility and Drives Progression of Early-Stage Triple-Negative Breast Cancer
Source: MDPI journal article supplement (doi:10.3390/ijms241411505), 2023-07-15
Supplement: s1 [file s1]

Figure S1

A

ANCO1 mRNA Expression by Breast Cancer Subtype

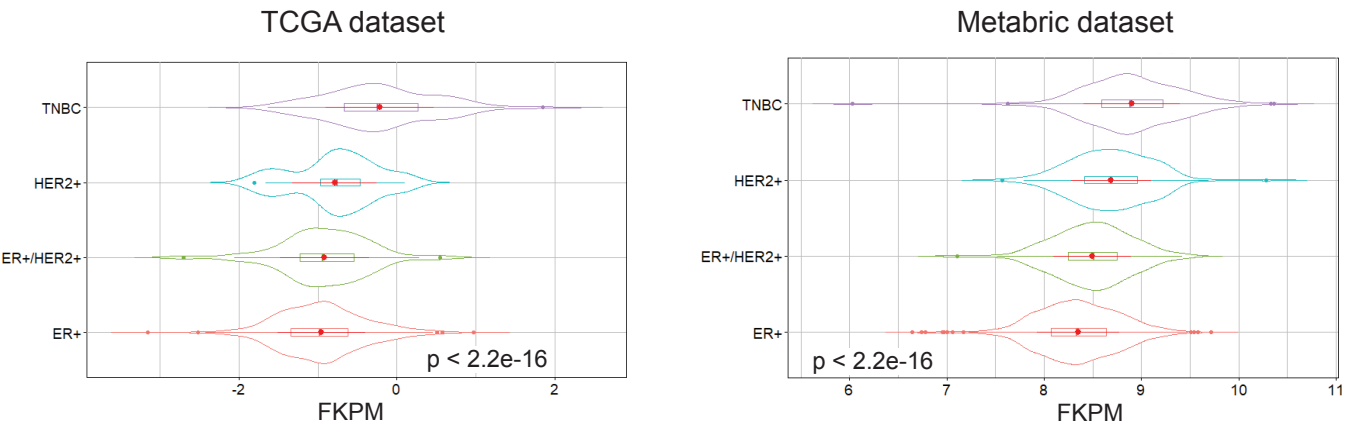

B

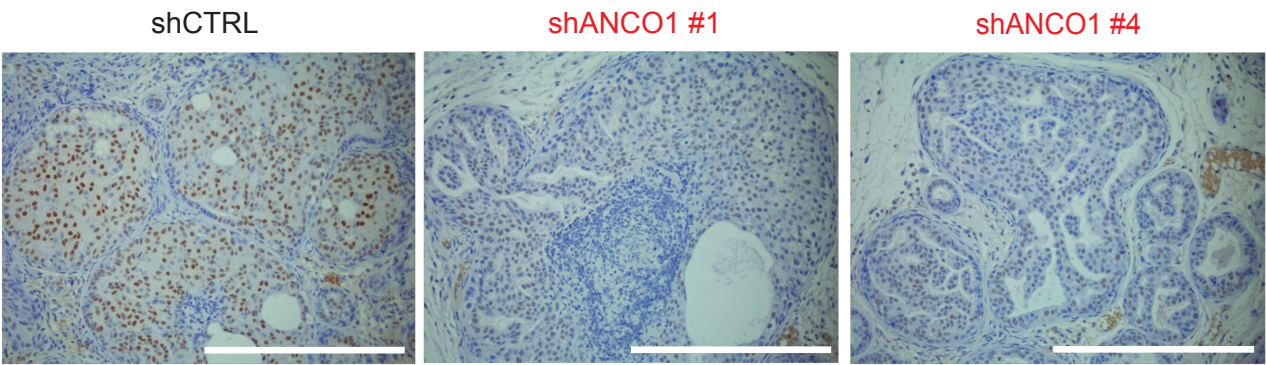

C

Nuclear ANCO1 Protein (IQR)  
ER+, HER2+, TNBC

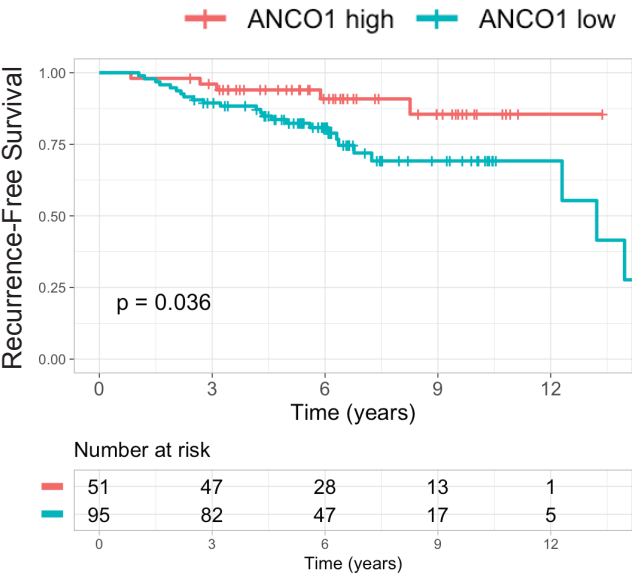

D

Cytoplasmic ANCO1 Protein (IQR)  
ER+, HER2+, TNBC

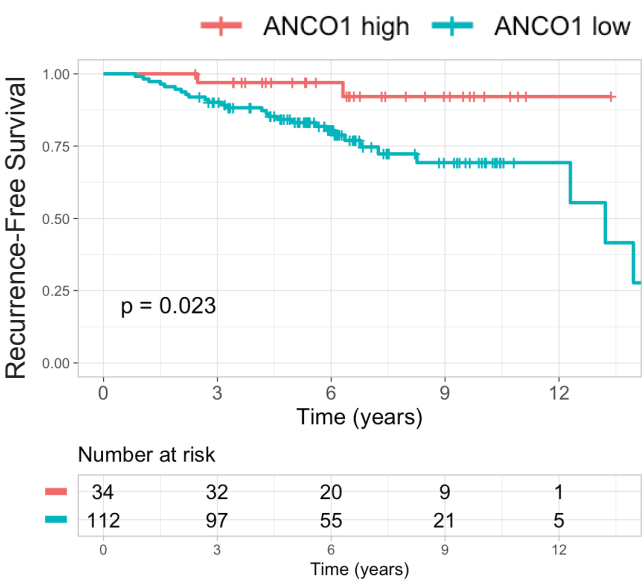

E

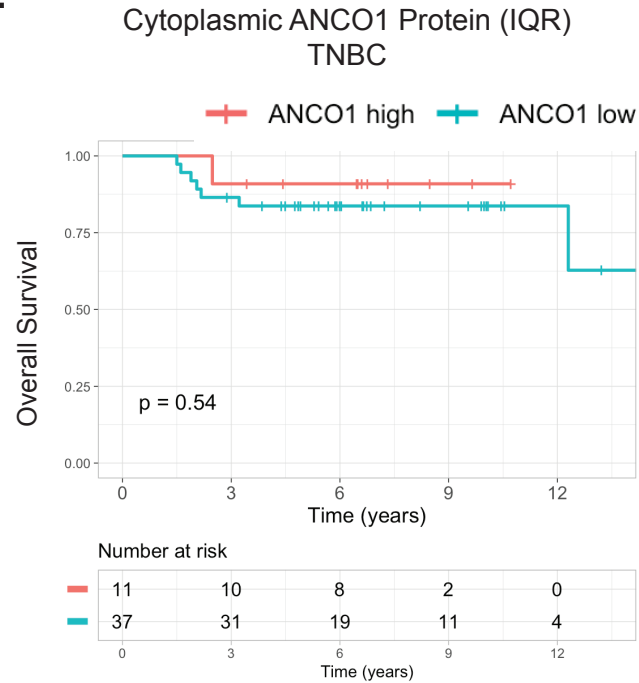

Figure s1: (A) ANCO1 mRNA levels in the different IHC subtypes of breast cancer. TCGA and Metabric datasets were used for this analysis. n= 526 and 1,257, respectively. ANOVA test was used for statistical analysis. (B) Representative images of ANCO1 IHC staining in mouse xenograft tumors. Scale bars, 200  $\mu$ m. (C) Recurrence-free survival probability based on nuclear ANCO1 protein levels in all subtypes of breast cancer in the TMA. ANCO1 level was stratified by IQR. n = 146 patients. (D) Recurrence-free survival probability based on cytoplasmic ANCO1 protein levels in all subtypes of breast cancer in the TMA. ANCO1 level was stratified by IQR. n = 146 patients. (E) Overall survival of patients with TNBC based on cytoplasmic ANCO1 protein expression. ANCO1 level was stratified by IQR. n = 48 patients.
