# Supplementary material for: Loss of ANCO1 Expression Regulates Chromatin Accessibility and Drives Progression of Early-Stage Triple-Negative Breast Cancer
Source: MDPI journal article supplement (doi:10.3390/ijms241411505), 2023-07-15
Supplement: s1 [file s1]

Figure S5

A

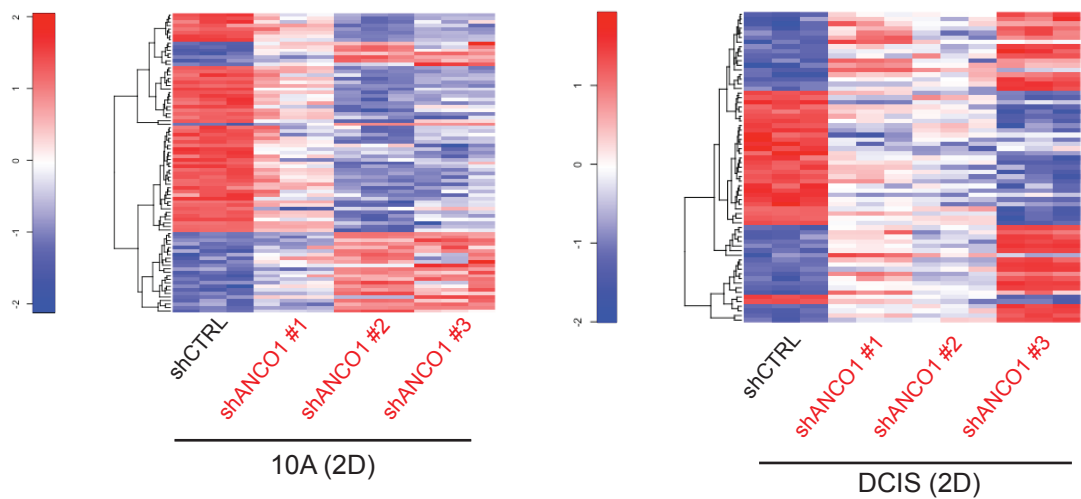

B

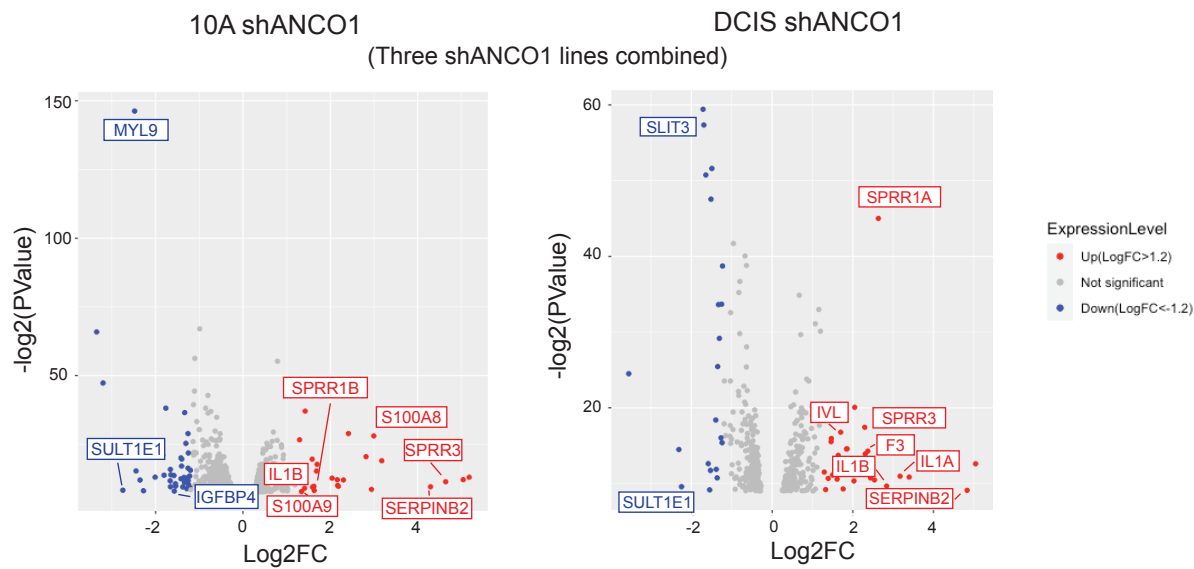

C

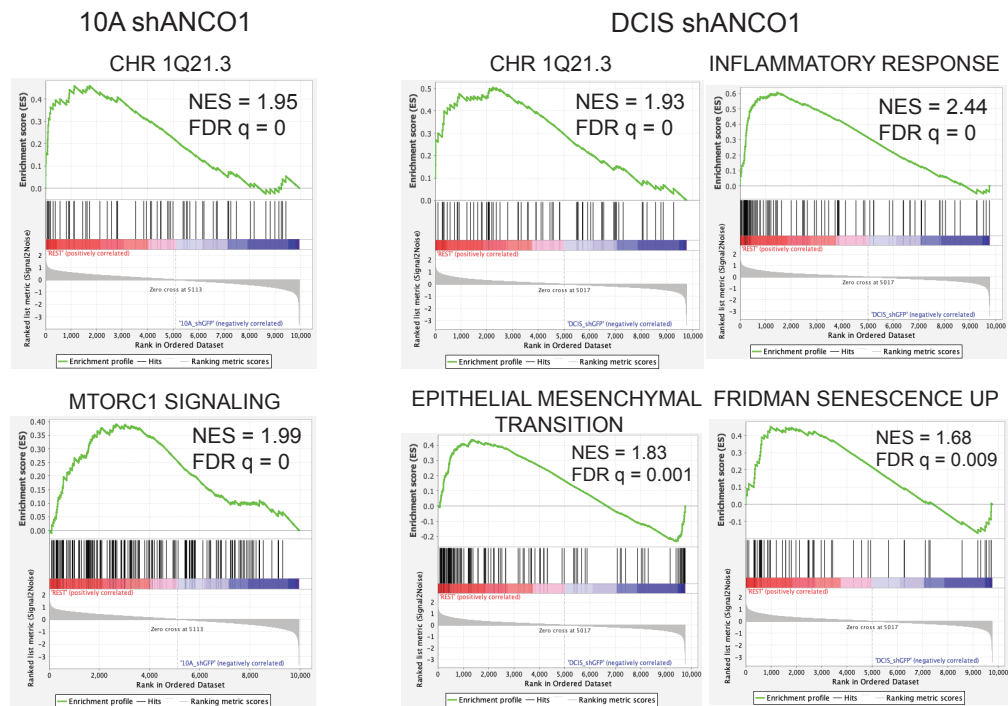

**D**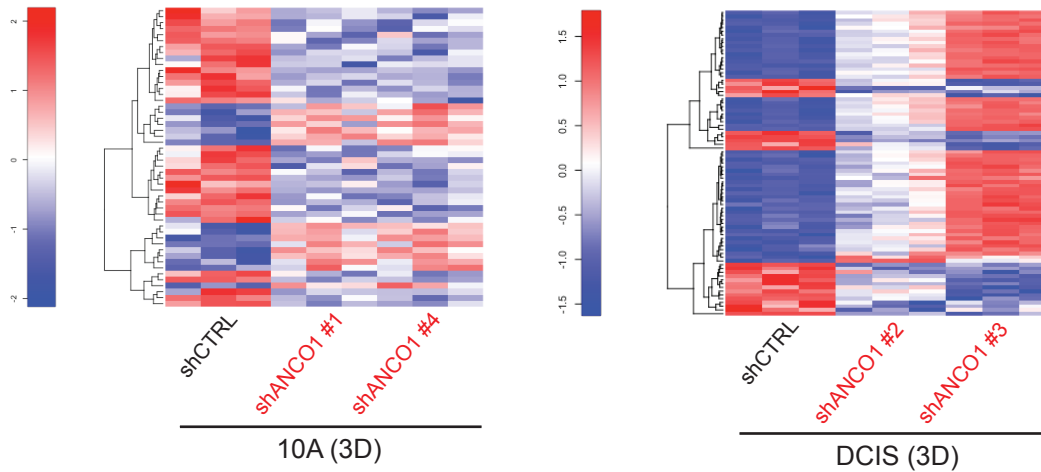**E**

10A shANCO1 (3D) DCIS shANCO1 (3D)  
(Two shANCO1 lines combined)

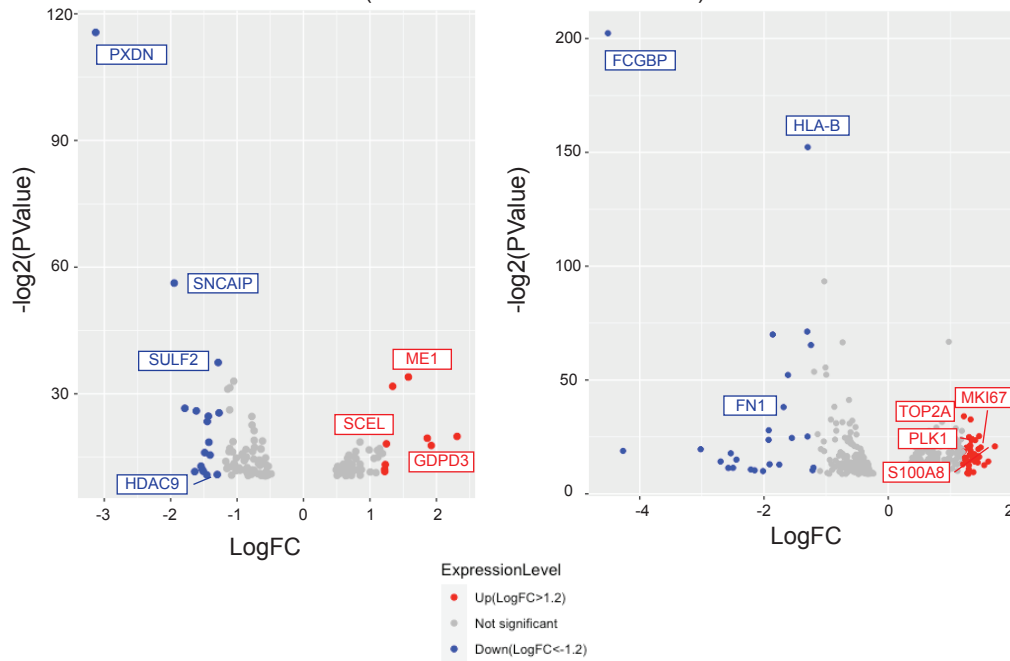**F**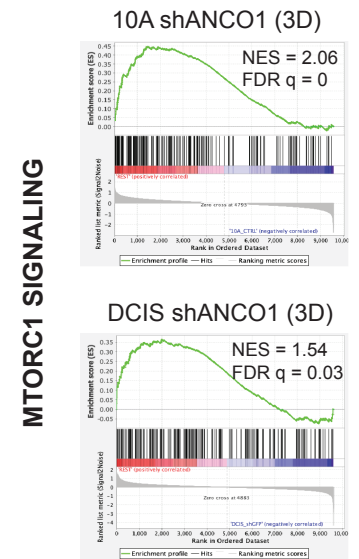

Figure s5:(A) Heatmaps showing top-ranked differentially expressed genes in 10A and DCIS shANCO1 versus control cell lines in 2D culture. Red and blue colors indicate high and low expressions respectively ( $P < 0.05$ ). (B) Volcano plots showing differentially expressed genes in 10A and DCIS shANCO1 versus control cell lines, in 2D cell culture. Red and blue colors indicate up- or down-regulated genes respectively. Three shANCO1 lines were combined for this analysis. Three biological replicates per condition. (C) Selected GSEA results of signaling pathways enriched in ANCO1 knockdown 10A and DCIS cell lines in 2D culture. (D) Heatmaps showing top-ranked differentially expressed genes in 10A and DCIS shANCO1 versus control cell lines in 3D culture ( $P < 0.05$ ). (E) Volcano plots showing differentially expressed genes in 10A and DCIS shANCO1 versus control 3D spheres. Two shANCO1 lines were combined for this analysis. (F) GSEA of mTORC1 signaling in shANCO1 10A and DCIS spheres compared to their respective controls.
