# Supplementary material for: Loss of ANCO1 Expression Regulates Chromatin Accessibility and Drives Progression of Early-Stage Triple-Negative Breast Cancer
Source: Int J Mol Sci. 2023 Jul 15;24(14):11505. doi: 10.3390/ijms241411505 (PMC10380654; doi:10.3390/ijms241411505)
Supplement: Supplementary file 1 [file ijms-24-11505-s001.zip › Supplementary Table S1.xlsx]

## Sheet: Sheet1
The demographics of patients in the TMA cohort. Total n = 150 patients.
Race	White: 96 (64%)
	Black: 40 (27%)
	Other: 14 (9%)
Group	ER+: 50 (33.3%)
	HER2+: 50 (33.3%)
	TNBC: 50 (33.3%)
Age at Diagnosis (years)	Mean: 54.66
	Range: 27.63-89.80
Lymph node status	Negative: 98 (65.3%)
	Positive: 47 (31.3%)
	N/A: 5 (3.3%)
Chemotherapy	No: 48 (32%)
	Yes: 102 (68%)
Radiation therapy	No: 88 (58.7%)
	Yes: 62 (41.3%)
Hormone Therapy	No: 90 (60%)
	Yes: 60 (40%)
