# Supplementary material for: Loss of ANCO1 Expression Regulates Chromatin Accessibility and Drives Progression of Early-Stage Triple-Negative Breast Cancer
Source: Int J Mol Sci. 2023 Jul 15;24(14):11505. doi: 10.3390/ijms241411505 (PMC10380654; doi:10.3390/ijms241411505)
Supplement: Supplementary file 1 [file ijms-24-11505-s001.zip › Supplementary Table S2.xlsx]

## Sheet: Sheet1
Counts of polyploid cells in DCIS shCTRL and shANCO1 cell lines from FISH analysis
	N=1	N=2	N=3	N=4	N=5	Sum
DCIS_shCTRL	15	340	30	18	0	403
DCIS_shANCO1 1#	8	354	18	60	1	441
DCIS_shANCO1 4#	15	223	19	199	0	456
