# Supplementary material for: Loss of ANCO1 Expression Regulates Chromatin Accessibility and Drives Progression of Early-Stage Triple-Negative Breast Cancer
Source: Int J Mol Sci. 2023 Jul 15;24(14):11505. doi: 10.3390/ijms241411505 (PMC10380654; doi:10.3390/ijms241411505)
Supplement: Supplementary file 1 [file ijms-24-11505-s001.zip › Supplementary Table S3.xlsx]

## Sheet: Sheet1
DAVID pathway analysis of genes annotated to ANCO1-regulated H3K27Ac peaks in 10A and DCIS cell lines
ANCO1-regulated peaks in 10A line							ANCO1-regulated peaks in DCIS line
Category	Term	Count	%	P-Value	Benjamini		Category	Term	Count	%	P-Value	Benjamini
KEGG_PATHWAY	Shigellosis	180	1.8	4.4e-21	1.5e-18		KEGG_PATHWAY	Proteoglycans in cancer	57	1.9	1.1e-08	2.4e-06
KEGG_PATHWAY	Salmonella infection	169	1.7	7e-15	1.2e-12		KEGG_PATHWAY	Focal adhesion	56	1.8	1.4e-08	2.4e-06
KEGG_PATHWAY	Bacterial invasion of epithelial cells	63	0.6	2.4e-11	2.7e-09		KEGG_PATHWAY	Shigellosis	64	2.1	2.5e-08	2.8e-06
KEGG_PATHWAY	Endocytosis	161	1.6	3.8e-11	3.3e-09		KEGG_PATHWAY	Axon guidance	50	1.7	1.5e-07	1.3e-05
KEGG_PATHWAY	Neurotrophin signaling pathway	86	0.9	4.5e-10	3.1e-08		KEGG_PATHWAY	MAPK signaling pathway	70	2.3	1.9e-07	1.3e-05
KEGG_PATHWAY	Pathogenic Escherichia coli infection	129	1.3	5.9e-10	3.1e-08		KEGG_PATHWAY	Leukocyte transendothelial migration	35	1.2	1e-06	5.6e-05
KEGG_PATHWAY	Small cell lung cancer	70	0.7	6.2e-10	3.1e-08		KEGG_PATHWAY	Rap1 signaling pathway	52	1.7	2.6e-06	0.00013
KEGG_PATHWAY	Colorectal cancer	65	0.7	4.5e-09	1.7e-07		KEGG_PATHWAY	Adherens junction	25	0.8	3.5e-06	0.00015
KEGG_PATHWAY	Adherens junction	56	0.6	4.6e-09	1.7e-07		KEGG_PATHWAY	Regulation of actin cytoskeleton	54	1.8	7.7e-06	0.00026
KEGG_PATHWAY	Chronic myeloid leukemia	59	0.6	4.8e-09	1.7e-07		KEGG_PATHWAY	Pathways in cancer	103	3.4	7.8e-06	0.00026
KEGG_PATHWAY	Cell cycle	88	0.9	8e-09	2.5e-07		KEGG_PATHWAY	Hippo signaling pathway	41	1.4	9.3e-06	0.00029
KEGG_PATHWAY	FoxO signaling pathway	90	0.9	1e-08	2.9e-07		KEGG_PATHWAY	Small cell lung cancer	28	0.9	1.8e-05	0.0005
KEGG_PATHWAY	Pathways in cancer	294	2.9	1.2e-08	3.3e-07		KEGG_PATHWAY	Hippo signaling pathway - multiple species	14	0.5	2e-05	0.00053
KEGG_PATHWAY	Ubiquitin mediated proteolysis	95	1	2.9e-08	7.3e-07		KEGG_PATHWAY	Pathogenic Escherichia coli infection	46	1.5	5.2e-05	0.0012
KEGG_PATHWAY	Yersinia infection	92	0.9	3.8e-08	8.8e-07		KEGG_PATHWAY	Bacterial invasion of epithelial cells	24	0.8	5.4e-05	0.0012
KEGG_PATHWAY	Protein processing in endoplasmic reticulum	110	1.1	5.2e-08	1.1e-06		KEGG_PATHWAY	Endocytosis	54	1.8	0.00011	0.0023
KEGG_PATHWAY	Renal cell carcinoma	53	0.5	6.3e-08	1.3e-06		KEGG_PATHWAY	Arrhythmogenic right ventricular cardiomyopathy	23	0.8	0.00016	0.0032
KEGG_PATHWAY	p53 signaling pathway	55	0.6	1e-07	2e-06		KEGG_PATHWAY	ECM-receptor interaction	25	0.8	0.00018	0.0034
KEGG_PATHWAY	Cellular senescence	101	1	1.2e-07	2.3e-06		KEGG_PATHWAY	Cellular senescence	37	1.2	0.00023	0.0041
KEGG_PATHWAY	Apoptosis	90	0.9	1.5e-07	2.6e-06		KEGG_PATHWAY	Tight junction	38	1.3	0.00057	0.0096
KEGG_PATHWAY	Insulin signaling pathway	90	0.9	2.5e-07	4.2e-06		KEGG_PATHWAY	Transcriptional misregulation in cancer	41	1.4	0.0011	0.018
KEGG_PATHWAY	Pancreatic cancer	56	0.6	2.7e-07	4.3e-06		KEGG_PATHWAY	EGFR tyrosine kinase inhibitor resistance	21	0.7	0.0017	0.026
KEGG_PATHWAY	Focal adhesion	123	1.2	4.7e-07	7e-06		KEGG_PATHWAY	Yersinia infection	31	1	0.0018	0.027
KEGG_PATHWAY	Proteoglycans in cancer	125	1.3	4.9e-07	7.1e-06		KEGG_PATHWAY	Chronic myeloid leukemia	20	0.7	0.0026	0.036
KEGG_PATHWAY	Alcoholism	115	1.2	8.1e-07	1.1e-05		KEGG_PATHWAY	PI3K-Akt signaling pathway	64	2.1	0.0032	0.041
KEGG_PATHWAY	TNF signaling pathway	75	0.8	9.7e-07	1.3e-05		KEGG_PATHWAY	Ras signaling pathway	46	1.5	0.0032	0.041
KEGG_PATHWAY	Endometrial cancer	44	0.4	1.9e-06	2.4e-05		KEGG_PATHWAY	Salmonella infection	48	1.6	0.0032	0.041
KEGG_PATHWAY	Amyotrophic lateral sclerosis	202	2	2.5e-06	3.1e-05		KEGG_PATHWAY	Gastric cancer	32	1.1	0.0036	0.043
KEGG_PATHWAY	ErbB signaling pathway	59	0.6	3.1e-06	3.7e-05		KEGG_PATHWAY	Cell adhesion molecules	33	1.1	0.0043	0.05
KEGG_PATHWAY	Regulation of actin cytoskeleton	134	1.3	4.4e-06	5e-05		KEGG_PATHWAY	Fluid shear stress and atherosclerosis	30	1	0.0045	0.051
KEGG_PATHWAY	Axon guidance	110	1.1	4.6e-06	5.2e-05		KEGG_PATHWAY	Adipocytokine signaling pathway	18	0.6	0.0049	0.052
KEGG_PATHWAY	Tight junction	103	1	5.8e-06	6.2e-05		KEGG_PATHWAY	Thyroid cancer	12	0.4	0.005	0.052
KEGG_PATHWAY	Hepatitis B	99	1	7.6e-06	8e-05		KEGG_PATHWAY	Phospholipase D signaling pathway	31	1	0.0061	0.062
KEGG_PATHWAY	Autophagy - animal	88	0.9	8.1e-06	8.3e-05		KEGG_PATHWAY	Alcoholism	37	1.2	0.0068	0.064
KEGG_PATHWAY	Spliceosome	91	0.9	9e-06	8.9e-05		KEGG_PATHWAY	Hepatocellular carcinoma	34	1.1	0.0068	0.064
KEGG_PATHWAY	Kaposi sarcoma-associated herpesvirus infection	115	1.2	9.9e-06	9.6e-05		KEGG_PATHWAY	Long-term depression	16	0.5	0.007	0.064
KEGG_PATHWAY	Viral carcinogenesis	120	1.2	1e-05	9.6e-05		KEGG_PATHWAY	Insulin signaling pathway	29	1	0.007	0.064
KEGG_PATHWAY	Necroptosis	97	1	1.1e-05	9.6e-05		KEGG_PATHWAY	Amoebiasis	23	0.8	0.0084	0.074
KEGG_PATHWAY	Thyroid cancer	30	0.3	1.5e-05	0.00013		KEGG_PATHWAY	ErbB signaling pathway	20	0.7	0.0094	0.079
KEGG_PATHWAY	EGFR tyrosine kinase inhibitor resistance	54	0.5	1.7e-05	0.00015		KEGG_PATHWAY	HIF-1 signaling pathway	24	0.8	0.0094	0.079
KEGG_PATHWAY	Lipid and atherosclerosis	124	1.2	2.7e-05	0.00022		KEGG_PATHWAY	Drug metabolism - other enzymes	19	0.6	0.01	0.086
KEGG_PATHWAY	AMPK signaling pathway	76	0.8	2.7e-05	0.00022		KEGG_PATHWAY	Bladder cancer	12	0.4	0.011	0.092
KEGG_PATHWAY	Pathways of neurodegeneration - multiple diseases	250	2.5	3.7e-05	0.00029		KEGG_PATHWAY	Systemic lupus erythematosus	28	0.9	0.012	0.092
KEGG_PATHWAY	Alzheimer disease	206	2.1	3.7e-05	0.00029		KEGG_PATHWAY	TNF signaling pathway	24	0.8	0.013	0.099
KEGG_PATHWAY	Hippo signaling pathway	94	0.9	4.2e-05	0.00032		KEGG_PATHWAY	AGE-RAGE signaling pathway in diabetic complications	22	0.7	0.013	0.1
KEGG_PATHWAY	Hepatitis C	94	0.9	4.2e-05	0.00032		KEGG_PATHWAY	Human papillomavirus infection	57	1.9	0.015	0.11
KEGG_PATHWAY	Human immunodeficiency virus 1 infection	121	1.2	6.4e-05	0.00047		KEGG_PATHWAY	Human cytomegalovirus infection	41	1.4	0.017	0.12
KEGG_PATHWAY	MAPK signaling pathway	161	1.6	7.4e-05	0.00053		KEGG_PATHWAY	Hypertrophic cardiomyopathy	20	0.7	0.017	0.12
KEGG_PATHWAY	mRNA surveillance pathway	62	0.6	8.1e-05	0.00058		KEGG_PATHWAY	Fc gamma R-mediated phagocytosis	21	0.7	0.019	0.13
KEGG_PATHWAY	HIF-1 signaling pathway	68	0.7	0.0001	0.00072		KEGG_PATHWAY	Calcium signaling pathway	43	1.4	0.019	0.13
KEGG_PATHWAY	Hepatocellular carcinoma	98	1	0.00011	0.00078		KEGG_PATHWAY	p53 signaling pathway	17	0.6	0.019	0.13
KEGG_PATHWAY	AGE-RAGE signaling pathway in diabetic complications	63	0.6	0.00013	0.00086		KEGG_PATHWAY	Apoptosis	27	0.9	0.021	0.14
KEGG_PATHWAY	Relaxin signaling pathway	78	0.8	0.00013	0.00086		KEGG_PATHWAY	Renal cell carcinoma	16	0.5	0.025	0.16
KEGG_PATHWAY	Mitophagy - animal	48	0.5	0.00014	0.00092		KEGG_PATHWAY	Apelin signaling pathway	27	0.9	0.027	0.17
KEGG_PATHWAY	Non-alcoholic fatty liver disease	91	0.9	0.00015	0.00096		KEGG_PATHWAY	Pancreatic cancer	17	0.6	0.028	0.17
KEGG_PATHWAY	Prostate cancer	61	0.6	0.00018	0.0011		KEGG_PATHWAY	Endometrial cancer	14	0.5	0.028	0.17
KEGG_PATHWAY	Long-term potentiation	45	0.5	0.00019	0.0012		KEGG_PATHWAY	Epithelial cell signaling in Helicobacter pylori infection	16	0.5	0.028	0.17
KEGG_PATHWAY	Human cytomegalovirus infection	125	1.3	0.00023	0.0014		KEGG_PATHWAY	Chagas disease	21	0.7	0.031	0.18
KEGG_PATHWAY	Sphingolipid signaling pathway	72	0.7	0.00024	0.0014		KEGG_PATHWAY	Dilated cardiomyopathy	20	0.7	0.032	0.18
KEGG_PATHWAY	Fluid shear stress and atherosclerosis	82	0.8	0.00027	0.0016		KEGG_PATHWAY	Lipid and atherosclerosis	38	1.3	0.033	0.19
KEGG_PATHWAY	Chagas disease	63	0.6	0.00029	0.0016		KEGG_PATHWAY	Neutrophil extracellular trap formation	34	1.1	0.038	0.21
KEGG_PATHWAY	Nucleotide metabolism	54	0.5	0.00032	0.0018		KEGG_PATHWAY	Wnt signaling pathway	31	1	0.038	0.21
KEGG_PATHWAY	Non-small cell lung cancer	47	0.5	0.00035	0.0019		KEGG_PATHWAY	Inflammatory mediator regulation of TRP channels	20	0.7	0.039	0.21
KEGG_PATHWAY	Homologous recombination	30	0.3	0.00036	0.0019		KEGG_PATHWAY	Hepatitis C	29	1	0.039	0.21
KEGG_PATHWAY	Dopaminergic synapse	78	0.8	0.00037	0.0019		KEGG_PATHWAY	Acute myeloid leukemia	15	0.5	0.04	0.21
KEGG_PATHWAY	Hippo signaling pathway - multiple species	23	0.2	0.00039	0.0021		KEGG_PATHWAY	FoxO signaling pathway	25	0.8	0.041	0.21
KEGG_PATHWAY	Platinum drug resistance	47	0.5	0.00056	0.0029		KEGG_PATHWAY	Colorectal cancer	18	0.6	0.041	0.21
KEGG_PATHWAY	Human papillomavirus infection	174	1.7	0.00059	0.003		KEGG_PATHWAY	Toxoplasmosis	22	0.7	0.043	0.21
KEGG_PATHWAY	Human T-cell leukemia virus 1 infection	121	1.2	0.0008	0.0039		KEGG_PATHWAY	Glioma	16	0.5	0.049	0.24
KEGG_PATHWAY	Phosphatidylinositol signaling system	59	0.6	0.00081	0.0039
KEGG_PATHWAY	Fc gamma R-mediated phagocytosis	59	0.6	0.00081	0.0039
KEGG_PATHWAY	Rap1 signaling pathway	115	1.2	0.00087	0.0042
KEGG_PATHWAY	Parkinson disease	142	1.4	0.00088	0.0042
KEGG_PATHWAY	Huntington disease	161	1.6	0.00092	0.0042
KEGG_PATHWAY	Apelin signaling pathway	80	0.8	0.00092	0.0042
KEGG_PATHWAY	Oocyte meiosis	76	0.8	0.00092	0.0042
KEGG_PATHWAY	NOD-like receptor signaling pathway	102	1	0.001	0.0046
KEGG_PATHWAY	Apoptosis - multiple species	24	0.2	0.001	0.0047
KEGG_PATHWAY	Bladder cancer	29	0.3	0.0011	0.0049
KEGG_PATHWAY	Nucleocytoplasmic transport	64	0.6	0.0012	0.0052
KEGG_PATHWAY	Insulin resistance	64	0.6	0.0012	0.0052
KEGG_PATHWAY	PD-L1 expression and PD-1 checkpoint pathway in cancer	54	0.5	0.0015	0.0064
KEGG_PATHWAY	Epithelial cell signaling in Helicobacter pylori infection	44	0.4	0.0018	0.0074
KEGG_PATHWAY	Transcriptional misregulation in cancer	105	1.1	0.002	0.0082
KEGG_PATHWAY	VEGF signaling pathway	38	0.4	0.0021	0.0088
KEGG_PATHWAY	IL-17 signaling pathway	56	0.6	0.0022	0.0088
KEGG_PATHWAY	Leukocyte transendothelial migration	66	0.7	0.0023	0.009
KEGG_PATHWAY	Proteasome	31	0.3	0.0023	0.0091
KEGG_PATHWAY	Acute myeloid leukemia	42	0.4	0.0025	0.0097
KEGG_PATHWAY	Glioma	46	0.5	0.0027	0.011
KEGG_PATHWAY	RNA degradation	48	0.5	0.0028	0.011
KEGG_PATHWAY	Various types of N-glycan biosynthesis	27	0.3	0.0028	0.011
KEGG_PATHWAY	Protein export	18	0.2	0.003	0.011
KEGG_PATHWAY	Ferroptosis	28	0.3	0.0031	0.011
KEGG_PATHWAY	Long-term depression	38	0.4	0.0033	0.012
KEGG_PATHWAY	C-type lectin receptor signaling pathway	60	0.6	0.0041	0.015
KEGG_PATHWAY	Endocrine resistance	57	0.6	0.0041	0.015
KEGG_PATHWAY	Spinocerebellar ataxia	79	0.8	0.0045	0.016
KEGG_PATHWAY	GnRH signaling pathway	54	0.5	0.0056	0.02
KEGG_PATHWAY	Neutrophil extracellular trap formation	101	1	0.0061	0.021
KEGG_PATHWAY	Chemical carcinogenesis - reactive oxygen species	116	1.2	0.008	0.027
KEGG_PATHWAY	mTOR signaling pathway	84	0.8	0.0083	0.028
KEGG_PATHWAY	Thyroid hormone signaling pathway	67	0.7	0.0086	0.029
KEGG_PATHWAY	Alcoholic liver disease	77	0.8	0.0093	0.031
KEGG_PATHWAY	Circadian rhythm	23	0.2	0.01	0.033
KEGG_PATHWAY	Gastric cancer	80	0.8	0.011	0.036
KEGG_PATHWAY	PI3K-Akt signaling pathway	176	1.8	0.012	0.038
KEGG_PATHWAY	Parathyroid hormone synthesis, secretion and action	59	0.6	0.012	0.039
KEGG_PATHWAY	Amoebiasis	57	0.6	0.012	0.04
KEGG_PATHWAY	Choline metabolism in cancer	55	0.6	0.013	0.04
KEGG_PATHWAY	Fanconi anemia pathway	33	0.3	0.014	0.043
KEGG_PATHWAY	Prolactin signaling pathway	41	0.4	0.014	0.044
KEGG_PATHWAY	Glycosaminoglycan biosynthesis - chondroitin sulfate / dermatan sulfate	15	0.2	0.015	0.046
KEGG_PATHWAY	Non-homologous end-joining	11	0.1	0.015	0.046
KEGG_PATHWAY	Longevity regulating pathway	50	0.5	0.017	0.053
KEGG_PATHWAY	Nucleotide excision repair	29	0.3	0.019	0.056
KEGG_PATHWAY	Toxoplasmosis	61	0.6	0.019	0.056
KEGG_PATHWAY	Legionellosis	34	0.3	0.019	0.056
KEGG_PATHWAY	Fatty acid metabolism	34	0.3	0.019	0.056
KEGG_PATHWAY	Ras signaling pathway	119	1.2	0.023	0.067
KEGG_PATHWAY	Wnt signaling pathway	88	0.9	0.024	0.069
KEGG_PATHWAY	Pertussis	43	0.4	0.025	0.07
KEGG_PATHWAY	Glucagon signaling pathway	58	0.6	0.025	0.07
KEGG_PATHWAY	Central carbon metabolism in cancer	40	0.4	0.025	0.071
KEGG_PATHWAY	Pyrimidine metabolism	34	0.3	0.026	0.073
KEGG_PATHWAY	N-Glycan biosynthesis	30	0.3	0.027	0.073
KEGG_PATHWAY	TGF-beta signaling pathway	52	0.5	0.028	0.075
KEGG_PATHWAY	Terpenoid backbone biosynthesis	16	0.2	0.029	0.079
KEGG_PATHWAY	Biosynthesis of unsaturated fatty acids	18	0.2	0.032	0.086
KEGG_PATHWAY	Progesterone-mediated oocyte maturation	55	0.6	0.033	0.086
KEGG_PATHWAY	Thermogenesis	116	1.2	0.033	0.086
KEGG_PATHWAY	Inositol phosphate metabolism	41	0.4	0.033	0.086
KEGG_PATHWAY	SNARE interactions in vesicular transport	21	0.2	0.035	0.091
KEGG_PATHWAY	Notch signaling pathway	34	0.3	0.035	0.092
KEGG_PATHWAY	Biosynthesis of nucleotide sugars	23	0.2	0.036	0.093
KEGG_PATHWAY	Basal transcription factors	27	0.3	0.037	0.094
KEGG_PATHWAY	Prion disease	134	1.3	0.042	0.11
KEGG_PATHWAY	Metabolic pathways	700	7	0.044	0.11
