# Supplementary material for: Loss of ANCO1 Expression Regulates Chromatin Accessibility and Drives Progression of Early-Stage Triple-Negative Breast Cancer
Source: Int J Mol Sci. 2023 Jul 15;24(14):11505. doi: 10.3390/ijms241411505 (PMC10380654; doi:10.3390/ijms241411505)
Supplement: Supplementary file 1 [file ijms-24-11505-s001.zip › Supplementary Table S5.xlsx]

## Sheet: Sheet1
Differentially expressed genes in shANCO1 versus shCTRL 10A and DCIS cells (absolute value of log2FC > 1.2)
10A shANCO1 compared to shCTRL (2D)							DCIS shANCO1 compared to shCTRL (2D)							10A shANCO1 compared to shCTRL (3D)							DCIS shANCO1 compared to shCTRL (3D)
	logFC	logCPM	PValue	FDR	symbol			logFC	logCPM	PValue	FDR	symbol			logFC	logCPM	PValue	FDR	symbol			logFC	logCPM	PValue	FDR	symbol
ENSG00000241494	5.17909	2.35955	0.000120428	0.00497683	RPL26P4		ENSG00000084710	5.04554	2.6042	0.000160026	0.00965912	EFR3B		ENSG00000143882	2.31144	4.30906	1.02e-06	0.000546161	ATP6V1C2		ENSG00000143546	1.71649	3.0168	5.25e-07	6.27e-05	S100A8
ENSG00000171401	5.04148	3.84256	0.000221814	0.0075823	KRT13		ENSG00000197632	4.83519	4.50593	0.0018192	0.0484092	SERPINB2		ENSG00000102886	1.92336	2.71865	4.49e-06	0.0016722	GDPD3		ENSG00000183856	1.6093	5.24744	5.29e-05	0.00266118	IQGAP3
ENSG00000163209	4.64049	1.93406	0.000373228	0.010593	SPRR3		ENSG00000183287	3.39814	2.93919	0.000541899	0.0222583	CCBE1		ENSG00000108602	1.86251	7.13544	1.36e-06	0.000691249	ALDH3A1		ENSG00000167772	1.54462	7.68188	0.000161136	0.00622952	ANGPTL4
ENSG00000197632	4.29342	2.56864	0.00132712	0.0230005	SERPINB2		ENSG00000115008	3.17197	8.1289	0.000501283	0.0214483	IL1A		ENSG00000065833	1.57858	6.12297	5.9e-11	1.43e-07	ME1		ENSG00000148773	1.48862	6.31444	7.17e-07	8.15e-05	MKI67
ENSG00000124102	3.17743	4.34796	1.87e-06	0.000245697	PI3		ENSG00000125538	2.83956	4.97245	0.00122973	0.0379225	IL1B		ENSG00000168907	1.34192	5.50599	2.73e-10	4.4e-07	PLA2G4F		ENSG00000123485	1.46455	4.17451	1.29e-05	0.000891957	HJURP
ENSG00000143546	2.99391	2.72452	3.57e-09	1.35e-06	S100A8		ENSG00000169474	2.63396	3.44074	2.82e-14	4.65e-11	SPRR1A		ENSG00000136155	1.24768	6.44078	3.41e-06	0.00131941	SCEL		ENSG00000066279	1.46232	5.45733	2.32e-08	5.47e-06	ASPM
ENSG00000228253	2.94243	4.98993	0.00255422	0.034046	ATP8		ENSG00000105388	2.53813	2.35406	0.000702214	0.0261324	CEACAM5		ENSG00000095321	1.2309	3.83337	0.00010289	0.014496	CRAT		ENSG00000126787	1.4501	4.80275	1.22e-06	0.000126975	DLGAP5
ENSG00000166535	2.8163	2.53306	6.8e-07	0.000107135	A2ML1		ENSG00000204949	2.43901	2.5576	0.000586851	0.0233813	FAM83A-AS1		ENSG00000117472	1.22286	5.16948	0.000323332	0.0301336	TSPAN1		ENSG00000169607	1.44265	3.38422	1.04e-05	0.000742596	CKAP2L
ENSG00000188856	2.41394	3.48468	1.96e-09	8.09e-07	RPSAP47		ENSG00000117525	2.37079	8.97411	5.03e-05	0.00404735	F3		ENSG00000197191	1.22062	3.20065	0.000231274	0.0254533	CYSRT1		ENSG00000137812	1.44038	4.09222	7.15e-05	0.00345636	KNL1
ENSG00000175315	2.29959	4.43384	0.000238861	0.00791689	CST6		ENSG00000158825	2.30814	2.92942	6.54e-05	0.00476585	CDA		ENSG00000163430	-1.2712	4.44077	2.13e-08	1.72e-05	FSTL1		ENSG00000111665	1.4198	2.77117	2e-05	0.00126335	CDCA3
ENSG00000123689	2.18436	3.42466	0.00118421	0.0214499	G0S2		ENSG00000163209	2.29619	3.54764	5.67e-06	0.00079049	SPRR3		ENSG00000196562	-1.28456	6.75501	5.43e-12	1.75e-08	SULF2		ENSG00000117399	1.39989	5.69957	8.05e-08	1.39e-05	CDC20
ENSG00000136689	2.16665	2.45357	0.000946223	0.0191248	IL1RN		ENSG00000086548	2.04695	4.3342	9.15e-07	0.00022089	CEACAM6		ENSG00000048052	-1.29839	3.55067	0.000529138	0.0434297	HDAC9		ENSG00000075218	1.39498	3.46596	5.55e-05	0.00276295	GTSE1
ENSG00000181524	2.15846	4.3509	0.000226056	0.00764641	RPL24P4		ENSG00000147689	2.02897	7.64323	0.000769178	0.0274877	FAM83A		ENSG00000159433	-1.40626	2.61838	2.16e-05	0.00489592	STARD9		ENSG00000140451	1.38408	2.99893	5.66e-06	0.000451804	PIF1
ENSG00000186832	2.03941	4.44197	0.00015292	0.00606583	KRT16		ENSG00000178172	1.86121	2.74863	4.07e-05	0.00346966	SPINK6		ENSG00000077942	-1.42482	3.67515	2.63e-06	0.00105982	FBLN1		ENSG00000138180	1.37404	4.37067	2.58e-05	0.00153193	CEP55
ENSG00000186468	1.69786	8.02319	4.62e-06	0.000495946	RPS23		ENSG00000136689	1.84265	3.36776	4.16e-05	0.00352311	IL1RN		ENSG00000140848	-1.43282	2.80239	3.68e-08	2.64e-05	CPNE2		ENSG00000051341	1.36961	3.37678	0.00135354	0.0329521	POLQ
ENSG00000185479	1.68174	3.24457	2.53e-05	0.00173633	KRT6B		ENSG00000171310	1.76072	5.16756	0.0016057	0.0450279	CHST11		ENSG00000127946	-1.44875	3.23831	8.75e-08	5.65e-05	HIP1		ENSG00000178999	1.35469	3.73054	3.07e-05	0.00173375	AURKB
ENSG00000169469	1.63096	3.26938	0.00337991	0.0406124	SPRR1B		ENSG00000163207	1.69853	4.08006	8.91e-06	0.00111687	IVL		ENSG00000115414	-1.45415	5.31247	0.000571022	0.0460863	FN1		ENSG00000166851	1.34966	5.05273	5.85e-08	1.11e-05	PLK1
ENSG00000125538	1.62385	4.94258	0.00117973	0.0214499	IL1B		ENSG00000116741	1.63993	4.0841	7.36e-05	0.00527686	RGS2		ENSG00000123094	-1.4878	2.93839	1.45e-05	0.00358955	RASSF8		ENSG00000118193	1.34038	4.55845	7.39e-08	1.3e-05	KIF14
ENSG00000197582	1.59005	3.17035	0.00141994	0.0236204	NA		ENSG00000171658	1.61125	3.75073	0.000652071	0.0248263	NMRAL2P		ENSG00000167552	-1.50791	3.82299	0.000310954	0.0298177	TUBA1A		ENSG00000122966	1.32609	4.38531	1.45e-10	6.94e-08	CIT
ENSG00000163993	1.58439	5.49271	1.26e-06	0.000170425	S100P		ENSG00000272398	1.49934	7.54997	0.000444716	0.0201016	CD24		ENSG00000106665	-1.52214	2.59965	0.000239689	0.0255098	CLIP2		ENSG00000135451	1.32348	3.4706	1.87e-06	0.000184048	TROAP
ENSG00000181885	1.42386	5.8662	6.89e-12	5.16e-09	CLDN7		ENSG00000124102	1.46724	6.83536	1.59e-05	0.00170797	PI3		ENSG00000078098	-1.5436	3.18918	0.000135021	0.016935	FAP		ENSG00000115163	1.31906	3.12001	4.95e-07	5.98e-05	CENPA
ENSG00000197191	1.40985	3.80114	0.00193997	0.0287704	CYSRT1		ENSG00000221968	1.46183	5.8643	2.12e-05	0.00211654	FADS3		ENSG00000003436	-1.61387	2.72176	1.53e-08	1.35e-05	TFPI		ENSG00000112984	1.31765	4.67389	3.73e-07	4.68e-05	KIF20A
ENSG00000113070	1.33922	4.32625	0.00450671	0.0480093	HBEGF		ENSG00000273760	1.39077	4.65549	0.000613593	0.0238194	NA		ENSG00000109819	-1.63755	4.35742	0.000327221	0.0301823	PPARGC1A		ENSG00000117650	1.31002	3.81653	6.87e-06	0.000523101	NEK2
ENSG00000167767	1.29573	5.24437	9.53e-09	3.11e-06	KRT80		ENSG00000057657	1.32681	3.47658	0.00170352	0.0469727	PRDM1		ENSG00000074219	-1.78652	3.45131	1e-08	1.08e-05	TEAD2		ENSG00000169679	1.30057	4.77233	3.12e-08	7e-06	BUB1
ENSG00000163220	1.20303	4.63263	0.000106353	0.00455797	S100A9		ENSG00000144959	1.29311	6.41641	0.0003437	0.0163571	NCEH1		ENSG00000064692	-1.94703	5.28819	1.18e-17	5.71e-14	SNCAIP		ENSG00000011426	1.2994	6.98462	0.000165077	0.00633122	ANLN
ENSG00000173166	-1.20463	3.14111	2.07e-05	0.00150416	RAPH1		ENSG00000143127	-1.23013	2.98357	2.2e-12	2.18e-09	ITGA10		ENSG00000130508	-3.12839	4.9929	1.59e-35	1.54e-31	PXDN		ENSG00000139734	1.29456	3.54076	0.000531435	0.0159513	DIAPH3
ENSG00000278266	-1.21659	3.10601	0.00147032	0.0240835	NA		ENSG00000181458	-1.24031	2.95468	2.33e-05	0.00225958	TMEM45A									ENSG00000109805	1.29267	4.02907	0.00219006	0.046216	NCAPG
ENSG00000136378	-1.22034	4.3219	8.74e-05	0.004111	ADAMTS7		ENSG00000106688	-1.25307	2.44785	7.27e-11	4.96e-08	SLC1A1									ENSG00000145386	1.28641	4.94836	4.58e-05	0.00236516	CCNA2
ENSG00000071242	-1.24851	5.69817	0.000747069	0.0169239	RPS6KA2		ENSG00000153993	-1.26745	2.92756	1.49e-05	0.00165834	SEMA3D									ENSG00000163507	1.27156	3.61078	0.00181736	0.0406593	CIP2A
ENSG00000187720	-1.25151	5.43843	2.65e-07	5.03e-05	THSD4		ENSG00000163032	-1.30694	2.67597	1.65e-09	7.44e-07	VSNL1									ENSG00000142945	1.2597	4.30809	7.61e-07	8.55e-05	KIF2C
ENSG00000134986	-1.25435	2.45437	0.000273855	0.00878203	NREP		ENSG00000145335	-1.33066	2.50599	7.52e-11	4.96e-08	SNCA									ENSG00000101057	1.23536	4.13127	4.9e-05	0.0025208	MYBL2
ENSG00000106366	-1.25758	9.28607	1.23e-05	0.00106562	SERPINE1		ENSG00000104368	-1.34963	6.7334	2.19e-08	8.99e-06	PLAT									ENSG00000237649	1.23439	4.00956	1.65e-05	0.00107253	KIFC1
ENSG00000053254	-1.25808	3.9309	1.99e-09	8.09e-07	FOXN3		ENSG00000077274	-1.36286	2.50368	0.000582941	0.0233625	CAPN6									ENSG00000131747	1.21712	6.47589	5.57e-11	2.99e-08	TOP2A
ENSG00000277048	-1.28673	7.68079	0.00213719	0.0307263	NA		ENSG00000133019	-1.38533	4.58096	0.000266212	0.0138543	CHRM3									ENSG00000090889	1.21381	3.85516	2.6e-06	0.000241913	KIF4A
ENSG00000162924	-1.29712	2.45476	0.00013957	0.00562615	REL		ENSG00000185885	-1.39749	2.61465	2.93e-06	0.000499503	IFITM1									ENSG00000112742	1.20125	3.58987	0.000122743	0.00513554	TTK
ENSG00000185900	-1.30803	3.1295	2.36e-08	5.82e-06	POMK		ENSG00000150893	-1.49421	3.85738	2.91e-16	9.62e-13	FREM2									ENSG00000258791	-1.20409	3.61749	0.000349293	0.0118453	LINC00520
ENSG00000163661	-1.33459	3.45412	1e-11	6.58e-09	PTX3		ENSG00000082497	-1.51602	4.19489	4.84e-15	9.59e-12	SERTAD4									ENSG00000102854	-1.21815	3.3176	0.000742504	0.0208613	MSLN
ENSG00000196159	-1.34074	3.39117	0.000455387	0.0121927	FAT4		ENSG00000092758	-1.529	4.46827	0.000294717	0.014785	COL9A3									ENSG00000078018	-1.24428	3.85511	2.11e-20	2.54e-17	MAP2
ENSG00000118523	-1.35052	6.35537	0.000126851	0.00517731	CCN2		ENSG00000111341	-1.54983	3.81055	0.00174822	0.0474456	MGP									ENSG00000234745	-1.2962	6.72753	1.42e-46	6.87e-43	HLA-B
ENSG00000162591	-1.37907	4.34422	0.0013915	0.0233342	MEGF6		ENSG00000104313	-1.58407	3.00379	0.000158433	0.00962167	EYA1									ENSG00000105929	-1.29923	2.7376	2.63e-08	6.06e-06	ATP6V0A4
ENSG00000229807	-1.40177	6.27014	1.23e-06	0.000168196	XIST		ENSG00000117115	-1.64331	3.39617	5.29e-16	1.31e-12	PADI2									ENSG00000204642	-1.30439	3.5158	3.5e-22	8.45e-19	HLA-F
ENSG00000144810	-1.40656	6.86984	7.21e-06	0.000712409	COL8A1		ENSG00000184347	-1.69332	3.68162	5.46e-18	2.7e-14	SLIT3									ENSG00000122254	-1.55188	2.62838	4.04e-08	8.49e-06	HS3ST2
ENSG00000156113	-1.41938	2.75845	0.000179353	0.0064889	KCNMA1		ENSG00000011028	-1.71271	4.49817	1.29e-18	1.28e-14	MRC2									ENSG00000094755	-1.61432	4.67753	1.9e-16	1.53e-13	GABRP
ENSG00000136869	-1.42046	2.95712	9.16e-07	0.00013509	TLR4		ENSG00000109193	-2.24665	3.28365	0.00130558	0.0395226	SULT1E1									ENSG00000115414	-1.68513	9.09909	3.38e-12	2.18e-09	FN1
ENSG00000213694	-1.54124	6.0884	0.00111207	0.0209067	S1PR3		ENSG00000131771	-2.31252	2.50366	4.34e-05	0.00364461	PPP1R1B									ENSG00000156103	-1.75419	3.01318	0.000136551	0.00554521	MMP16
ENSG00000275530	-1.54726	6.61854	0.000623225	0.0148346	NA		ENSG00000064300	-3.55559	4.56941	4.2e-08	1.6e-05	NGFR									ENSG00000109846	-1.85933	3.55014	8.51e-22	1.64e-18	CRYAB
ENSG00000141753	-1.57334	3.08995	0.00396346	0.0448934	IGFBP4																ENSG00000129451	-1.9101	7.13954	0.000123776	0.00515471	KLK10
ENSG00000170160	-1.58188	3.16538	7.81e-05	0.00381756	CCDC144A																ENSG00000182352	-1.92404	2.58594	3.91e-09	1.26e-06	CD300LD-AS1
ENSG00000011028	-1.65239	3.96581	6.41e-05	0.00338394	MRC2																ENSG00000131737	-1.92617	2.97462	7.27e-08	1.3e-05	KRT34
ENSG00000137868	-1.65975	3.40484	0.00132736	0.0230005	STRA6																ENSG00000277765	-2.01555	5.59201	0.000978626	0.0256326	NA
ENSG00000030419	-1.66214	3.59051	1.65e-05	0.00131555	IKZF2																ENSG00000277105	-2.15059	5.23558	0.000768296	0.0213994	NA
ENSG00000169047	-1.66688	4.95355	0.000297149	0.00920045	IRS1																ENSG00000277048	-2.21192	9.56625	0.000604489	0.0178121	NA
ENSG00000152377	-1.76637	4.84159	3.27e-12	2.69e-09	SPOCK1																ENSG00000202198	-2.44463	2.7847	2.98e-05	0.00171302	RN7SK
ENSG00000153531	-1.80726	2.7263	7.17e-05	0.00361431	ADPRHL1																ENSG00000274735	-2.49795	5.32441	0.000365429	0.0122634	NA
ENSG00000198959	-1.83997	3.87076	4.62e-07	7.74e-05	TGM2																ENSG00000276402	-2.53501	4.56202	4.34e-06	0.000374915	NA
ENSG00000105419	-2.01178	2.32881	0.000118016	0.00489768	MEIS3																ENSG00000275530	-2.57455	7.99588	0.00037536	0.0124242	NA
ENSG00000180447	-2.27893	3.12018	0.00364638	0.0425211	GAS1																ENSG00000276924	-2.69914	5.45278	5.31e-05	0.00266118	NA
ENSG00000122862	-2.35711	3.87106	0.000243486	0.00801636	SRGN																ENSG00000275209	-3.01914	4.36547	1.26e-06	0.000126975	NA
ENSG00000154734	-2.44855	2.11357	2.44e-05	0.00169813	ADAMTS1																ENSG00000281181	-4.26902	8.7631	2.09e-06	0.000203436	NA
ENSG00000101335	-2.48082	2.94897	9.35e-45	9.24e-41	MYL9																ENSG00000275395	-4.51201	2.44866	1.22e-61	1.18e-57	FCGBP
ENSG00000109193	-2.75083	3.61536	0.00318854	0.0393088	SULT1E1
ENSG00000133110	-3.20367	2.65702	5.76e-15	9.49e-12	POSTN
ENSG00000146674	-3.35152	5.95696	1.46e-20	4.81e-17	IGFBP3
