# Supplementary material for: Loss of ANCO1 Expression Regulates Chromatin Accessibility and Drives Progression of Early-Stage Triple-Negative Breast Cancer
Source: Int J Mol Sci. 2023 Jul 15;24(14):11505. doi: 10.3390/ijms241411505 (PMC10380654; doi:10.3390/ijms241411505)
Supplement: Supplementary file 1 [file ijms-24-11505-s001.zip › Supplementary Table S6.xlsx]

## Sheet: Sheet1
GSEA analysis of shANCO1 versus shCTRL 10A and DCIS cells in 2D and 3D cultures
10A 2D (shANCO1 #1, #2, #3 combined)											DCIS 2D (shANCO1 #1, #2, #3 combined)											10A 3D (shANCO1 #1, #4 combined)											DCIS 3D (shANCO1 #2, #3 combined)
NAME	GS<br> follow link to MSigDB	SIZE	ES	NES	NOM p-val	FDR q-val	FWER p-val	RANK AT MAX	LEADING EDGE		NAME	GS<br> follow link to MSigDB	SIZE	ES	NES	NOM p-val	FDR q-val	FWER p-val	RANK AT MAX	LEADING EDGE		NAME	GS<br> follow link to MSigDB	SIZE	ES	NES	NOM p-val	FDR q-val	FWER p-val	RANK AT MAX	LEADING EDGE		NAME	GS<br> follow link to MSigDB	SIZE	ES	NES	NOM p-val	FDR q-val	FWER p-val	RANK AT MAX	LEADING EDGE
HALLMARK_MYC_TARGETS_V1	HALLMARK_MYC_TARGETS_V1	197	0.574493	2.94777	0	0	0	3387	tags=71%, list=34%, signal=106%		HALLMARK_TNFA_SIGNALING_VIA_NFKB	HALLMARK_TNFA_SIGNALING_VIA_NFKB	156	0.642524	2.81366	0	0	0	1254	tags=54%, list=13%, signal=62%		HALLMARK_OXIDATIVE_PHOSPHORYLATION	HALLMARK_OXIDATIVE_PHOSPHORYLATION	191	0.632764	2.99951	0	0	0	2661	tags=78%, list=28%, signal=106%		HALLMARK_E2F_TARGETS	HALLMARK_E2F_TARGETS	183	0.773	3.26097	0	0	0	1267	tags=61%, list=13%, signal=69%
HALLMARK_MYC_TARGETS_V2	HALLMARK_MYC_TARGETS_V2	56	0.642469	2.66527	0	0	0	2685	tags=75%, list=27%, signal=102%		HALLMARK_INFLAMMATORY_RESPONSE	HALLMARK_INFLAMMATORY_RESPONSE	91	0.607553	2.44362	0	0	0	1461	tags=51%, list=15%, signal=59%		HALLMARK_ADIPOGENESIS	HALLMARK_ADIPOGENESIS	159	0.531487	2.43746	0	0	0	1827	tags=48%, list=19%, signal=58%		HALLMARK_G2M_CHECKPOINT	HALLMARK_G2M_CHECKPOINT	186	0.759351	3.17846	0	0	0	903	tags=49%, list=9%, signal=53%
HALLMARK_OXIDATIVE_PHOSPHORYLATION	HALLMARK_OXIDATIVE_PHOSPHORYLATION	193	0.509392	2.62801	0	0	0	3595	tags=65%, list=36%, signal=100%		HALLMARK_P53_PATHWAY	HALLMARK_P53_PATHWAY	173	0.534951	2.372	0	0	0	2268	tags=49%, list=23%, signal=62%		HALLMARK_FATTY_ACID_METABOLISM	HALLMARK_FATTY_ACID_METABOLISM	122	0.51997	2.26933	0	0.000306667	0.001	1722	tags=44%, list=18%, signal=53%		HALLMARK_MITOTIC_SPINDLE	HALLMARK_MITOTIC_SPINDLE	188	0.584752	2.49583	0	0	0	1048	tags=31%, list=11%, signal=34%
HALLMARK_UV_RESPONSE_UP	HALLMARK_UV_RESPONSE_UP	116	0.489625	2.36587	0	0	0	2508	tags=50%, list=25%, signal=66%		HALLMARK_REACTIVE_OXYGEN_SPECIES_PATHWAY	HALLMARK_REACTIVE_OXYGEN_SPECIES_PATHWAY	42	0.548961	1.91308	0	0.00107031	0.004	1760	tags=45%, list=18%, signal=55%		HALLMARK_XENOBIOTIC_METABOLISM	HALLMARK_XENOBIOTIC_METABOLISM	119	0.510343	2.2595	0	0.00023	0.001	1375	tags=37%, list=14%, signal=43%		HALLMARK_MYC_TARGETS_V1	HALLMARK_MYC_TARGETS_V1	197	0.510643	2.18478	0	0	0	2636	tags=51%, list=27%, signal=69%
HALLMARK_E2F_TARGETS	HALLMARK_E2F_TARGETS	199	0.444985	2.30243	0	0	0	3460	tags=61%, list=35%, signal=92%		HALLMARK_IL6_JAK_STAT3_SIGNALING	HALLMARK_IL6_JAK_STAT3_SIGNALING	44	0.541865	1.87732	0	0.00107694	0.005	1310	tags=34%, list=13%, signal=39%		HALLMARK_REACTIVE_OXYGEN_SPECIES_PATHWAY	HALLMARK_REACTIVE_OXYGEN_SPECIES_PATHWAY	41	0.60364	2.14449	0	0.000184	0.001	1513	tags=49%, list=16%, signal=58%		HALLMARK_SPERMATOGENESIS	HALLMARK_SPERMATOGENESIS	51	0.625254	2.15914	0	0	0	1199	tags=35%, list=12%, signal=40%
HALLMARK_DNA_REPAIR	HALLMARK_DNA_REPAIR	137	0.429044	2.13011	0	0.000194444	0.001	2525	tags=47%, list=25%, signal=63%		HALLMARK_COMPLEMENT	HALLMARK_COMPLEMENT	111	0.445377	1.84155	0	0.00122098	0.007	1396	tags=34%, list=14%, signal=39%		HALLMARK_PEROXISOME	HALLMARK_PEROXISOME	80	0.499054	2.07458	0	0.000153333	0.001	2648	tags=59%, list=28%, signal=81%		HALLMARK_MYC_TARGETS_V2	HALLMARK_MYC_TARGETS_V2	56	0.509027	1.78459	0.00178571	0.00332895	0.019	2490	tags=45%, list=26%, signal=60%
HALLMARK_MTORC1_SIGNALING	HALLMARK_MTORC1_SIGNALING	183	0.389251	1.99172	0	0.000354167	0.002	2656	tags=43%, list=27%, signal=58%		HALLMARK_APOPTOSIS	HALLMARK_APOPTOSIS	119	0.434964	1.83871	0	0.00119893	0.008	1677	tags=38%, list=17%, signal=45%		HALLMARK_MTORC1_SIGNALING	HALLMARK_MTORC1_SIGNALING	177	0.447497	2.05996	0	0.000131429	0.001	1471	tags=35%, list=15%, signal=41%		HALLMARK_REACTIVE_OXYGEN_SPECIES_PATHWAY	HALLMARK_REACTIVE_OXYGEN_SPECIES_PATHWAY	41	0.516211	1.7205	0.00534759	0.00622081	0.041	1421	tags=37%, list=15%, signal=43%
HALLMARK_P53_PATHWAY	HALLMARK_P53_PATHWAY	172	0.318141	1.61046	0	0.013838	0.081	1768	tags=28%, list=18%, signal=33%		HALLMARK_EPITHELIAL_MESENCHYMAL_TRANSITION	HALLMARK_EPITHELIAL_MESENCHYMAL_TRANSITION	117	0.434454	1.82674	0	0.00143798	0.011	1389	tags=44%, list=14%, signal=50%		HALLMARK_BILE_ACID_METABOLISM	HALLMARK_BILE_ACID_METABOLISM	56	0.505394	1.95307	0	0.000511107	0.004	1874	tags=46%, list=20%, signal=57%		HALLMARK_GLYCOLYSIS	HALLMARK_GLYCOLYSIS	165	0.3785	1.59077	0	0.0199932	0.141	1756	tags=30%, list=18%, signal=36%
HALLMARK_REACTIVE_OXYGEN_SPECIES_PATHWAY	HALLMARK_REACTIVE_OXYGEN_SPECIES_PATHWAY	43	0.373878	1.47254	0.0229008	0.0402279	0.247	3355	tags=51%, list=34%, signal=77%		HALLMARK_INTERFERON_GAMMA_RESPONSE	HALLMARK_INTERFERON_GAMMA_RESPONSE	108	0.428231	1.77618	0	0.00162828	0.014	1368	tags=31%, list=14%, signal=36%		HALLMARK_GLYCOLYSIS	HALLMARK_GLYCOLYSIS	147	0.428741	1.91756	0	0.000576011	0.005	2093	tags=42%, list=22%, signal=53%		HALLMARK_MTORC1_SIGNALING	HALLMARK_MTORC1_SIGNALING	181	0.363375	1.54344	0	0.0298602	0.227	2000	tags=31%, list=21%, signal=38%
HALLMARK_UNFOLDED_PROTEIN_RESPONSE	HALLMARK_UNFOLDED_PROTEIN_RESPONSE	106	0.308337	1.47024	0.00308642	0.0368523	0.25	2422	tags=36%, list=24%, signal=47%		HALLMARK_APICAL_JUNCTION	HALLMARK_APICAL_JUNCTION	125	0.418791	1.76711	0	0.00170201	0.016	1177	tags=31%, list=12%, signal=35%		HALLMARK_ESTROGEN_RESPONSE_EARLY	HALLMARK_ESTROGEN_RESPONSE_EARLY	144	0.401032	1.8076	0	0.00149566	0.014	2102	tags=46%, list=22%, signal=58%		HALLMARK_HYPOXIA	HALLMARK_HYPOXIA	144	0.374277	1.53259	0	0.0301418	0.251	1822	tags=35%, list=19%, signal=43%
HALLMARK_PI3K_AKT_MTOR_SIGNALING	HALLMARK_PI3K_AKT_MTOR_SIGNALING	83	0.328536	1.46972	0.018018	0.0335021	0.25	2075	tags=34%, list=21%, signal=42%		HALLMARK_UV_RESPONSE_UP	HALLMARK_UV_RESPONSE_UP	121	0.419396	1.76649	0	0.00154728	0.016	1815	tags=36%, list=19%, signal=43%		HALLMARK_CHOLESTEROL_HOMEOSTASIS	HALLMARK_CHOLESTEROL_HOMEOSTASIS	61	0.456645	1.78933	0.00430108	0.00172505	0.018	1647	tags=44%, list=17%, signal=53%		HALLMARK_ANDROGEN_RESPONSE	HALLMARK_ANDROGEN_RESPONSE	82	0.376171	1.40706	0.0346021	0.0866652	0.589	2004	tags=35%, list=21%, signal=44%
HALLMARK_ESTROGEN_RESPONSE_LATE	HALLMARK_ESTROGEN_RESPONSE_LATE	138	0.276237	1.37255	0.0162866	0.0668265	0.474	1384	tags=29%, list=14%, signal=33%		HALLMARK_KRAS_SIGNALING_UP	HALLMARK_KRAS_SIGNALING_UP	101	0.412324	1.67955	0.00161551	0.00434209	0.047	760	tags=33%, list=8%, signal=35%		HALLMARK_PROTEIN_SECRETION	HALLMARK_PROTEIN_SECRETION	91	0.419527	1.74865	0	0.0020111	0.023	2831	tags=46%, list=30%, signal=65%		HALLMARK_TNFA_SIGNALING_VIA_NFKB	HALLMARK_TNFA_SIGNALING_VIA_NFKB	151	0.321298	1.3231	0.0275974	0.15559	0.843	1479	tags=30%, list=15%, signal=35%
HALLMARK_G2M_CHECKPOINT	HALLMARK_G2M_CHECKPOINT	196	0.239563	1.23527	0.0492424	0.170777	0.83	3146	tags=41%, list=32%, signal=58%		HALLMARK_IL2_STAT5_SIGNALING	HALLMARK_IL2_STAT5_SIGNALING	117	0.372801	1.56384	0.00167504	0.0170418	0.179	1381	tags=30%, list=14%, signal=34%		HALLMARK_HEME_METABOLISM	HALLMARK_HEME_METABOLISM	140	0.384998	1.72712	0	0.00219945	0.027	2535	tags=39%, list=26%, signal=52%		HALLMARK_INFLAMMATORY_RESPONSE	HALLMARK_INFLAMMATORY_RESPONSE	87	0.349004	1.3128	0.0569948	0.156073	0.868	1663	tags=32%, list=17%, signal=39%
HALLMARK_ADIPOGENESIS	HALLMARK_ADIPOGENESIS	162	0.220179	1.12659	0.18638	0.327513	0.982	3272	tags=41%, list=33%, signal=60%		HALLMARK_HYPOXIA	HALLMARK_HYPOXIA	139	0.349278	1.50099	0.0083612	0.0308026	0.32	2272	tags=42%, list=23%, signal=55%		HALLMARK_ESTROGEN_RESPONSE_LATE	HALLMARK_ESTROGEN_RESPONSE_LATE	128	0.376812	1.66674	0	0.00421868	0.054	1792	tags=38%, list=19%, signal=46%		HALLMARK_PEROXISOME	HALLMARK_PEROXISOME	76	0.346015	1.27012	0.108434	0.19917	0.936	1922	tags=25%, list=20%, signal=31%
HALLMARK_APOPTOSIS	HALLMARK_APOPTOSIS	127	0.222088	1.08612	0.255319	0.390833	0.991	573	tags=13%, list=6%, signal=13%		HALLMARK_UNFOLDED_PROTEIN_RESPONSE	HALLMARK_UNFOLDED_PROTEIN_RESPONSE	107	0.348767	1.44425	0.00826446	0.0482477	0.484	2578	tags=36%, list=26%, signal=48%		HALLMARK_HYPOXIA	HALLMARK_HYPOXIA	136	0.288991	1.3038	0.0490405	0.104222	0.799	947	tags=20%, list=10%, signal=22%		HALLMARK_FATTY_ACID_METABOLISM	HALLMARK_FATTY_ACID_METABOLISM	114	0.309775	1.22443	0.116751	0.255255	0.978	1608	tags=24%, list=17%, signal=28%
HALLMARK_GLYCOLYSIS	HALLMARK_GLYCOLYSIS	158	0.196323	0.988253	0.483108	0.627403	1	2175	tags=29%, list=22%, signal=37%		HALLMARK_MYOGENESIS	HALLMARK_MYOGENESIS	86	0.351655	1.40454	0.0193662	0.0639399	0.609	1654	tags=31%, list=17%, signal=37%		HALLMARK_P53_PATHWAY	HALLMARK_P53_PATHWAY	172	0.275227	1.27544	0.0382023	0.120154	0.866	2297	tags=33%, list=24%, signal=43%		HALLMARK_ESTROGEN_RESPONSE_LATE	HALLMARK_ESTROGEN_RESPONSE_LATE	144	0.288653	1.18437	0.149565	0.314146	0.994	1340	tags=26%, list=14%, signal=29%
HALLMARK_CHOLESTEROL_HOMEOSTASIS	HALLMARK_CHOLESTEROL_HOMEOSTASIS	62	0.190592	0.817238	0.826873	1	1	1766	tags=21%, list=18%, signal=25%		HALLMARK_ALLOGRAFT_REJECTION	HALLMARK_ALLOGRAFT_REJECTION	79	0.361063	1.39769	0.0227642	0.0635104	0.632	2333	tags=33%, list=24%, signal=43%		HALLMARK_PI3K_AKT_MTOR_SIGNALING	HALLMARK_PI3K_AKT_MTOR_SIGNALING	84	0.301981	1.26572	0.0850112	0.121399	0.881	2597	tags=36%, list=27%, signal=49%		HALLMARK_CHOLESTEROL_HOMEOSTASIS	HALLMARK_CHOLESTEROL_HOMEOSTASIS	62	0.323921	1.17153	0.205527	0.320423	0.997	1088	tags=23%, list=11%, signal=25%
HALLMARK_ALLOGRAFT_REJECTION	HALLMARK_ALLOGRAFT_REJECTION	77	0.18307	0.808375	0.837758	1	1	2650	tags=31%, list=27%, signal=42%		HALLMARK_XENOBIOTIC_METABOLISM	HALLMARK_XENOBIOTIC_METABOLISM	114	0.33753	1.39486	0.0259516	0.0616417	0.641	1387	tags=24%, list=14%, signal=27%		HALLMARK_UNFOLDED_PROTEIN_RESPONSE	HALLMARK_UNFOLDED_PROTEIN_RESPONSE	106	0.290929	1.25419	0.0895833	0.125638	0.906	2774	tags=41%, list=29%, signal=56%		HALLMARK_PROTEIN_SECRETION	HALLMARK_PROTEIN_SECRETION	91	0.296837	1.11295	0.241993	0.425948	0.999	2058	tags=27%, list=21%, signal=35%
HALLMARK_INTERFERON_GAMMA_RESPONSE	HALLMARK_INTERFERON_GAMMA_RESPONSE	111	0.161836	0.767074	0.947075	1	1	2650	tags=27%, list=27%, signal=36%		HALLMARK_GLYCOLYSIS	HALLMARK_GLYCOLYSIS	155	0.304692	1.32153	0.0306947	0.105212	0.844	2489	tags=37%, list=25%, signal=49%		HALLMARK_NOTCH_SIGNALING	HALLMARK_NOTCH_SIGNALING	25	0.368165	1.17332	0.226337	0.202371	0.982	1042	tags=32%, list=11%, signal=36%		HALLMARK_ANGIOGENESIS	HALLMARK_ANGIOGENESIS	19	0.404332	1.10386	0.340952	0.424413	0.999	860	tags=26%, list=9%, signal=29%
HALLMARK_FATTY_ACID_METABOLISM	HALLMARK_FATTY_ACID_METABOLISM	115	0.147466	0.701264	0.983819	1	1	2674	tags=28%, list=27%, signal=38%		HALLMARK_TGF_BETA_SIGNALING	HALLMARK_TGF_BETA_SIGNALING	50	0.35338	1.25295	0.150538	0.164183	0.947	2531	tags=38%, list=26%, signal=51%		HALLMARK_UV_RESPONSE_UP	HALLMARK_UV_RESPONSE_UP	116	0.265832	1.15808	0.160173	0.211662	0.988	2087	tags=32%, list=22%, signal=40%		HALLMARK_APOPTOSIS	HALLMARK_APOPTOSIS	123	0.276943	1.10143	0.264249	0.408369	0.999	898	tags=19%, list=9%, signal=20%
HALLMARK_SPERMATOGENESIS	HALLMARK_SPERMATOGENESIS	49	0.150238	0.602249	0.9925	0.99368	1	2927	tags=31%, list=29%, signal=43%		HALLMARK_PROTEIN_SECRETION	HALLMARK_PROTEIN_SECRETION	91	0.310211	1.24943	0.110727	0.161017	0.952	2347	tags=31%, list=24%, signal=40%		HALLMARK_MYOGENESIS	HALLMARK_MYOGENESIS	86	0.246421	1.01965	0.413793	0.447088	1	639	tags=15%, list=7%, signal=16%		HALLMARK_UV_RESPONSE_DN	HALLMARK_UV_RESPONSE_DN	106	0.274609	1.08416	0.27383	0.427027	0.999	1635	tags=26%, list=17%, signal=31%
HALLMARK_EPITHELIAL_MESENCHYMAL_TRANSITION	HALLMARK_EPITHELIAL_MESENCHYMAL_TRANSITION	124	-0.644696	-2.82232	0	0	0	946	tags=40%, list=9%, signal=44%		HALLMARK_PI3K_AKT_MTOR_SIGNALING	HALLMARK_PI3K_AKT_MTOR_SIGNALING	85	0.310601	1.24364	0.114783	0.159968	0.961	590	tags=11%, list=6%, signal=11%		HALLMARK_KRAS_SIGNALING_DN	HALLMARK_KRAS_SIGNALING_DN	62	0.235403	0.936395	0.570577	0.620235	1	1646	tags=23%, list=17%, signal=27%		HALLMARK_PI3K_AKT_MTOR_SIGNALING	HALLMARK_PI3K_AKT_MTOR_SIGNALING	83	0.276498	1.04271	0.370968	0.505097	1	2357	tags=35%, list=25%, signal=46%
HALLMARK_UV_RESPONSE_DN	HALLMARK_UV_RESPONSE_DN	114	-0.574093	-2.49903	0	0	0	2067	tags=50%, list=21%, signal=62%		HALLMARK_COAGULATION	HALLMARK_COAGULATION	56	0.341892	1.23979	0.149565	0.156759	0.963	968	tags=30%, list=10%, signal=34%		HALLMARK_MYC_TARGETS_V1	HALLMARK_MYC_TARGETS_V1	196	0.15257	0.718971	0.990826	0.959831	1	3251	tags=34%, list=34%, signal=51%		HALLMARK_DNA_REPAIR	HALLMARK_DNA_REPAIR	134	0.251002	1.02534	0.391525	0.525638	1	2438	tags=28%, list=25%, signal=36%
HALLMARK_MITOTIC_SPINDLE	HALLMARK_MITOTIC_SPINDLE	190	-0.421946	-1.98128	0	0.000282828	0.001	2348	tags=40%, list=24%, signal=51%		HALLMARK_HEDGEHOG_SIGNALING	HALLMARK_HEDGEHOG_SIGNALING	19	0.391461	1.14624	0.258348	0.277636	0.998	2390	tags=63%, list=24%, signal=83%		HALLMARK_G2M_CHECKPOINT	HALLMARK_G2M_CHECKPOINT	170	-0.520555	-2.32728	0	0	0	2765	tags=59%, list=29%, signal=82%		HALLMARK_APICAL_JUNCTION	HALLMARK_APICAL_JUNCTION	125	0.252126	1.02199	0.398291	0.511997	1	1584	tags=23%, list=17%, signal=27%
HALLMARK_ANGIOGENESIS	HALLMARK_ANGIOGENESIS	19	-0.619819	-1.86284	0.00180832	0.00287357	0.013	1501	tags=37%, list=15%, signal=43%		HALLMARK_HEME_METABOLISM	HALLMARK_HEME_METABOLISM	137	0.258084	1.09667	0.272131	0.361111	0.999	2449	tags=37%, list=25%, signal=49%		HALLMARK_MITOTIC_SPINDLE	HALLMARK_MITOTIC_SPINDLE	181	-0.492348	-2.26177	0	0	0	1608	tags=35%, list=17%, signal=41%		HALLMARK_BILE_ACID_METABOLISM	HALLMARK_BILE_ACID_METABOLISM	52	0.273207	0.954102	0.536673	0.662599	1	1696	tags=17%, list=18%, signal=21%
HALLMARK_HEDGEHOG_SIGNALING	HALLMARK_HEDGEHOG_SIGNALING	19	-0.626594	-1.83022	0.00550459	0.00298123	0.017	2270	tags=53%, list=23%, signal=68%		HALLMARK_MYC_TARGETS_V2	HALLMARK_MYC_TARGETS_V2	56	0.293789	1.08451	0.336252	0.370564	1	2524	tags=32%, list=26%, signal=43%		HALLMARK_TGF_BETA_SIGNALING	HALLMARK_TGF_BETA_SIGNALING	50	-0.618134	-2.24866	0	0	0	1458	tags=40%, list=15%, signal=47%		HALLMARK_APICAL_SURFACE	HALLMARK_APICAL_SURFACE	23	0.319583	0.924654	0.570671	0.711627	1	737	tags=17%, list=8%, signal=19%
HALLMARK_MYOGENESIS	HALLMARK_MYOGENESIS	86	-0.423052	-1.75363	0	0.0051519	0.036	2008	tags=35%, list=20%, signal=43%		HALLMARK_ANGIOGENESIS	HALLMARK_ANGIOGENESIS	19	0.373351	1.05801	0.367837	0.408448	1	2390	tags=47%, list=24%, signal=63%		HALLMARK_E2F_TARGETS	HALLMARK_E2F_TARGETS	168	-0.496495	-2.24273	0	0	0	2531	tags=54%, list=26%, signal=72%		HALLMARK_XENOBIOTIC_METABOLISM	HALLMARK_XENOBIOTIC_METABOLISM	112	0.228274	0.893537	0.67753	0.761752	1	2000	tags=29%, list=21%, signal=37%
HALLMARK_HYPOXIA	HALLMARK_HYPOXIA	142	-0.386493	-1.73215	0	0.00553739	0.045	1633	tags=27%, list=16%, signal=32%		HALLMARK_ANDROGEN_RESPONSE	HALLMARK_ANDROGEN_RESPONSE	83	0.2599	1.02914	0.402377	0.453182	1	1897	tags=29%, list=19%, signal=36%		HALLMARK_EPITHELIAL_MESENCHYMAL_TRANSITION	HALLMARK_EPITHELIAL_MESENCHYMAL_TRANSITION	101	-0.526722	-2.22538	0	0	0	1626	tags=45%, list=17%, signal=53%		HALLMARK_UNFOLDED_PROTEIN_RESPONSE	HALLMARK_UNFOLDED_PROTEIN_RESPONSE	107	0.222285	0.862441	0.76007	0.805063	1	2852	tags=37%, list=30%, signal=53%
HALLMARK_COAGULATION	HALLMARK_COAGULATION	64	-0.435901	-1.72081	0.00643087	0.00570359	0.053	2297	tags=47%, list=23%, signal=61%		HALLMARK_MTORC1_SIGNALING	HALLMARK_MTORC1_SIGNALING	182	0.221719	0.990844	0.463722	0.519666	1	2449	tags=29%, list=25%, signal=38%		HALLMARK_INTERFERON_ALPHA_RESPONSE	HALLMARK_INTERFERON_ALPHA_RESPONSE	68	-0.535152	-2.07956	0	0.000332386	0.002	1321	tags=37%, list=14%, signal=42%		HALLMARK_HEME_METABOLISM	HALLMARK_HEME_METABOLISM	138	0.201081	0.828088	0.847039	0.84672	1	1138	tags=14%, list=12%, signal=15%
HALLMARK_BILE_ACID_METABOLISM	HALLMARK_BILE_ACID_METABOLISM	56	-0.440725	-1.69741	0.00158983	0.00664455	0.068	2336	tags=38%, list=23%, signal=49%		HALLMARK_DNA_REPAIR	HALLMARK_DNA_REPAIR	137	0.223104	0.953515	0.566303	0.589428	1	3038	tags=36%, list=31%, signal=51%		HALLMARK_UV_RESPONSE_DN	HALLMARK_UV_RESPONSE_DN	108	-0.416595	-1.74584	0	0.00567023	0.041	1244	tags=30%, list=13%, signal=34%		HALLMARK_ADIPOGENESIS	HALLMARK_ADIPOGENESIS	159	0.173092	0.723795	0.987097	0.950198	1	2346	tags=23%, list=24%, signal=29%
HALLMARK_TGF_BETA_SIGNALING	HALLMARK_TGF_BETA_SIGNALING	52	-0.430961	-1.62945	0.00801282	0.0134818	0.149	1836	tags=40%, list=18%, signal=49%		HALLMARK_CHOLESTEROL_HOMEOSTASIS	HALLMARK_CHOLESTEROL_HOMEOSTASIS	62	0.226626	0.854514	0.738694	0.795502	1	1029	tags=16%, list=11%, signal=18%		HALLMARK_INTERFERON_GAMMA_RESPONSE	HALLMARK_INTERFERON_GAMMA_RESPONSE	116	-0.403186	-1.734	0	0.00557419	0.046	1279	tags=28%, list=13%, signal=31%		HALLMARK_INTERFERON_ALPHA_RESPONSE	HALLMARK_INTERFERON_ALPHA_RESPONSE	57	-0.52902	-1.95281	0.00219298	0.00461029	0.005	1671	tags=44%, list=17%, signal=53%
HALLMARK_KRAS_SIGNALING_DN	HALLMARK_KRAS_SIGNALING_DN	51	-0.405825	-1.50779	0.0213115	0.0365269	0.381	1435	tags=35%, list=14%, signal=41%		HALLMARK_MYC_TARGETS_V1	HALLMARK_MYC_TARGETS_V1	196	0.0907109	0.408383	1	0.999931	1	3630	tags=28%, list=37%, signal=43%		HALLMARK_IL6_JAK_STAT3_SIGNALING	HALLMARK_IL6_JAK_STAT3_SIGNALING	47	-0.426882	-1.54242	0.0132075	0.0279174	0.226	1574	tags=28%, list=16%, signal=33%		HALLMARK_COAGULATION	HALLMARK_COAGULATION	62	-0.440541	-1.64582	0.00228833	0.0468579	0.1	783	tags=27%, list=8%, signal=30%
HALLMARK_ANDROGEN_RESPONSE	HALLMARK_ANDROGEN_RESPONSE	84	-0.365361	-1.50364	0.0241692	0.0345667	0.389	2206	tags=35%, list=22%, signal=44%		HALLMARK_E2F_TARGETS	HALLMARK_E2F_TARGETS	196	-0.469283	-2.20402	0	0	0	2167	tags=45%, list=22%, signal=57%		HALLMARK_APICAL_JUNCTION	HALLMARK_APICAL_JUNCTION	116	-0.355274	-1.51758	0.00376648	0.0300752	0.267	1667	tags=31%, list=17%, signal=37%		HALLMARK_KRAS_SIGNALING_DN	HALLMARK_KRAS_SIGNALING_DN	45	-0.471167	-1.63214	0.00453515	0.0346528	0.112	1184	tags=47%, list=12%, signal=53%
HALLMARK_ESTROGEN_RESPONSE_EARLY	HALLMARK_ESTROGEN_RESPONSE_EARLY	143	-0.32833	-1.47421	0.00456621	0.0416615	0.485	940	tags=22%, list=9%, signal=24%		HALLMARK_G2M_CHECKPOINT	HALLMARK_G2M_CHECKPOINT	194	-0.449073	-2.12135	0	0	0	3003	tags=53%, list=31%, signal=75%		HALLMARK_ALLOGRAFT_REJECTION	HALLMARK_ALLOGRAFT_REJECTION	80	-0.360788	-1.46354	0.0211132	0.0457872	0.407	1191	tags=16%, list=12%, signal=18%		HALLMARK_NOTCH_SIGNALING	HALLMARK_NOTCH_SIGNALING	24	-0.499781	-1.52148	0.0334728	0.0611648	0.234	2851	tags=67%, list=30%, signal=95%
HALLMARK_IL2_STAT5_SIGNALING	HALLMARK_IL2_STAT5_SIGNALING	116	-0.337386	-1.4669	0.0160584	0.0414085	0.509	1614	tags=27%, list=16%, signal=32%		HALLMARK_KRAS_SIGNALING_DN	HALLMARK_KRAS_SIGNALING_DN	48	-0.452558	-1.70637	0.00869565	0.0145298	0.051	1071	tags=42%, list=11%, signal=47%		HALLMARK_KRAS_SIGNALING_UP	HALLMARK_KRAS_SIGNALING_UP	88	-0.35582	-1.45585	0.018018	0.0450354	0.429	1901	tags=35%, list=20%, signal=44%		HALLMARK_MYOGENESIS	HALLMARK_MYOGENESIS	93	-0.349709	-1.38915	0.0402844	0.136344	0.522	1345	tags=26%, list=14%, signal=30%
HALLMARK_COMPLEMENT	HALLMARK_COMPLEMENT	116	-0.333233	-1.45749	0.0133136	0.0416563	0.536	2230	tags=36%, list=22%, signal=46%		HALLMARK_NOTCH_SIGNALING	HALLMARK_NOTCH_SIGNALING	25	-0.521131	-1.6595	0.0192308	0.0180906	0.083	258	tags=24%, list=3%, signal=25%		HALLMARK_TNFA_SIGNALING_VIA_NFKB	HALLMARK_TNFA_SIGNALING_VIA_NFKB	152	-0.30512	-1.34264	0.0298246	0.10483	0.746	1785	tags=26%, list=19%, signal=32%		HALLMARK_INTERFERON_GAMMA_RESPONSE	HALLMARK_INTERFERON_GAMMA_RESPONSE	100	-0.343255	-1.37803	0.0225225	0.125267	0.554	1302	tags=23%, list=14%, signal=26%
HALLMARK_APICAL_JUNCTION	HALLMARK_APICAL_JUNCTION	127	-0.323944	-1.4263	0.0230548	0.0500422	0.624	1688	tags=24%, list=17%, signal=29%		HALLMARK_BILE_ACID_METABOLISM	HALLMARK_BILE_ACID_METABOLISM	54	-0.395167	-1.49895	0.0232558	0.0491019	0.262	1908	tags=33%, list=20%, signal=41%		HALLMARK_APICAL_SURFACE	HALLMARK_APICAL_SURFACE	22	-0.443136	-1.33154	0.120623	0.105636	0.782	1191	tags=27%, list=12%, signal=31%		HALLMARK_ESTROGEN_RESPONSE_EARLY	HALLMARK_ESTROGEN_RESPONSE_EARLY	146	-0.305222	-1.31796	0.044289	0.167627	0.715	1602	tags=27%, list=17%, signal=32%
HALLMARK_KRAS_SIGNALING_UP	HALLMARK_KRAS_SIGNALING_UP	94	-0.316336	-1.32526	0.0742424	0.107045	0.896	807	tags=18%, list=8%, signal=19%		HALLMARK_ESTROGEN_RESPONSE_LATE	HALLMARK_ESTROGEN_RESPONSE_LATE	140	-0.326506	-1.46174	0.00738916	0.0552097	0.336	1722	tags=34%, list=18%, signal=41%		HALLMARK_HEDGEHOG_SIGNALING	HALLMARK_HEDGEHOG_SIGNALING	17	-0.429135	-1.21901	0.199623	0.222011	0.963	2690	tags=59%, list=28%, signal=82%		HALLMARK_EPITHELIAL_MESENCHYMAL_TRANSITION	HALLMARK_EPITHELIAL_MESENCHYMAL_TRANSITION	115	-0.308107	-1.27525	0.0569307	0.200412	0.824	903	tags=23%, list=9%, signal=25%
HALLMARK_APICAL_SURFACE	HALLMARK_APICAL_SURFACE	24	-0.41742	-1.31941	0.129252	0.105551	0.907	1320	tags=29%, list=13%, signal=34%		HALLMARK_SPERMATOGENESIS	HALLMARK_SPERMATOGENESIS	52	-0.374466	-1.39173	0.0482456	0.0831292	0.522	2623	tags=44%, list=27%, signal=60%		HALLMARK_IL2_STAT5_SIGNALING	HALLMARK_IL2_STAT5_SIGNALING	112	-0.275549	-1.16229	0.172745	0.306852	0.993	1210	tags=16%, list=13%, signal=18%		HALLMARK_KRAS_SIGNALING_UP	HALLMARK_KRAS_SIGNALING_UP	92	-0.307715	-1.23369	0.116705	0.236106	0.91	1560	tags=34%, list=16%, signal=40%
HALLMARK_NOTCH_SIGNALING	HALLMARK_NOTCH_SIGNALING	26	-0.403658	-1.29285	0.142857	0.124866	0.949	1954	tags=35%, list=20%, signal=43%		HALLMARK_ESTROGEN_RESPONSE_EARLY	HALLMARK_ESTROGEN_RESPONSE_EARLY	143	-0.297353	-1.33994	0.035533	0.108405	0.658	1327	tags=24%, list=14%, signal=28%		HALLMARK_ANGIOGENESIS	HALLMARK_ANGIOGENESIS	15	-0.39532	-1.08927	0.344828	0.441155	1	902	tags=20%, list=9%, signal=22%		HALLMARK_IL2_STAT5_SIGNALING	HALLMARK_IL2_STAT5_SIGNALING	114	-0.268851	-1.10877	0.214646	0.477447	0.994	1001	tags=20%, list=10%, signal=22%
HALLMARK_INFLAMMATORY_RESPONSE	HALLMARK_INFLAMMATORY_RESPONSE	94	-0.268262	-1.14901	0.23622	0.301233	1	1137	tags=19%, list=11%, signal=21%		HALLMARK_MITOTIC_SPINDLE	HALLMARK_MITOTIC_SPINDLE	194	-0.278493	-1.30068	0.0246575	0.131576	0.76	1846	tags=28%, list=19%, signal=34%		HALLMARK_WNT_BETA_CATENIN_SIGNALING	HALLMARK_WNT_BETA_CATENIN_SIGNALING	27	-0.33616	-1.06438	0.347909	0.475689	1	2923	tags=52%, list=31%, signal=74%		HALLMARK_HEDGEHOG_SIGNALING	HALLMARK_HEDGEHOG_SIGNALING	21	-0.379881	-1.10023	0.311579	0.453788	0.995	594	tags=19%, list=6%, signal=20%
HALLMARK_TNFA_SIGNALING_VIA_NFKB	HALLMARK_TNFA_SIGNALING_VIA_NFKB	153	-0.253029	-1.14059	0.213675	0.301722	1	2063	tags=27%, list=21%, signal=34%		HALLMARK_UV_RESPONSE_DN	HALLMARK_UV_RESPONSE_DN	107	-0.280918	-1.22258	0.107232	0.203381	0.914	1634	tags=27%, list=17%, signal=32%		HALLMARK_COMPLEMENT	HALLMARK_COMPLEMENT	120	-0.244812	-1.05534	0.315175	0.473149	1	1236	tags=20%, list=13%, signal=23%		HALLMARK_P53_PATHWAY	HALLMARK_P53_PATHWAY	174	-0.243882	-1.07163	0.292271	0.489632	0.999	1808	tags=28%, list=19%, signal=33%
HALLMARK_HEME_METABOLISM	HALLMARK_HEME_METABOLISM	143	-0.248094	-1.11251	0.256983	0.336457	1	2937	tags=38%, list=29%, signal=54%		HALLMARK_APICAL_SURFACE	HALLMARK_APICAL_SURFACE	22	-0.378087	-1.18014	0.24026	0.248105	0.957	1335	tags=36%, list=14%, signal=42%		HALLMARK_APOPTOSIS	HALLMARK_APOPTOSIS	125	-0.238749	-1.02902	0.386447	0.51425	1	1605	tags=22%, list=17%, signal=27%		HALLMARK_COMPLEMENT	HALLMARK_COMPLEMENT	110	-0.262165	-1.05813	0.347188	0.48601	1	987	tags=17%, list=10%, signal=19%
HALLMARK_WNT_BETA_CATENIN_SIGNALING	HALLMARK_WNT_BETA_CATENIN_SIGNALING	28	-0.339847	-1.1104	0.301003	0.325813	1	1796	tags=32%, list=18%, signal=39%		HALLMARK_ADIPOGENESIS	HALLMARK_ADIPOGENESIS	160	-0.232049	-1.08039	0.270886	0.417261	0.998	2882	tags=38%, list=30%, signal=53%		HALLMARK_ANDROGEN_RESPONSE	HALLMARK_ANDROGEN_RESPONSE	87	-0.247462	-1.00316	0.43985	0.553392	1	1138	tags=17%, list=12%, signal=19%		HALLMARK_UV_RESPONSE_UP	HALLMARK_UV_RESPONSE_UP	118	-0.251559	-1.03822	0.370192	0.50147	1	882	tags=14%, list=9%, signal=16%
HALLMARK_PROTEIN_SECRETION	HALLMARK_PROTEIN_SECRETION	89	-0.26219	-1.08218	0.30506	0.362066	1	3179	tags=40%, list=32%, signal=59%		HALLMARK_WNT_BETA_CATENIN_SIGNALING	HALLMARK_WNT_BETA_CATENIN_SIGNALING	27	-0.336854	-1.08013	0.319911	0.385552	0.998	975	tags=22%, list=10%, signal=25%		HALLMARK_COAGULATION	HALLMARK_COAGULATION	61	-0.262252	-0.992661	0.468635	0.554118	1	1598	tags=21%, list=17%, signal=25%		HALLMARK_TGF_BETA_SIGNALING	HALLMARK_TGF_BETA_SIGNALING	50	-0.281791	-1.00329	0.440909	0.556116	1	1916	tags=34%, list=20%, signal=42%
HALLMARK_XENOBIOTIC_METABOLISM	HALLMARK_XENOBIOTIC_METABOLISM	121	-0.244322	-1.06025	0.356338	0.38968	1	1262	tags=17%, list=13%, signal=19%		HALLMARK_FATTY_ACID_METABOLISM	HALLMARK_FATTY_ACID_METABOLISM	113	-0.234114	-1.0257	0.378788	0.481346	1	2707	tags=35%, list=28%, signal=48%		HALLMARK_INFLAMMATORY_RESPONSE	HALLMARK_INFLAMMATORY_RESPONSE	91	-0.217859	-0.903399	0.653992	0.751889	1	1195	tags=14%, list=12%, signal=16%		HALLMARK_ALLOGRAFT_REJECTION	HALLMARK_ALLOGRAFT_REJECTION	73	-0.25786	-0.983585	0.5058	0.571109	1	1895	tags=34%, list=20%, signal=42%
HALLMARK_INTERFERON_ALPHA_RESPONSE	HALLMARK_INTERFERON_ALPHA_RESPONSE	60	-0.248056	-0.961644	0.515974	0.573975	1	1780	tags=20%, list=18%, signal=24%		HALLMARK_PEROXISOME	HALLMARK_PEROXISOME	77	-0.247313	-1.00204	0.448598	0.504605	1	1520	tags=23%, list=16%, signal=27%		HALLMARK_DNA_REPAIR	HALLMARK_DNA_REPAIR	125	-0.199494	-0.871705	0.761553	0.798704	1	1971	tags=22%, list=21%, signal=27%		HALLMARK_IL6_JAK_STAT3_SIGNALING	HALLMARK_IL6_JAK_STAT3_SIGNALING	42	-0.269521	-0.932821	0.564103	0.669184	1	1641	tags=31%, list=17%, signal=37%
HALLMARK_IL6_JAK_STAT3_SIGNALING	HALLMARK_IL6_JAK_STAT3_SIGNALING	46	-0.225554	-0.835994	0.732372	0.819667	1	834	tags=15%, list=8%, signal=17%		HALLMARK_INTERFERON_ALPHA_RESPONSE	HALLMARK_INTERFERON_ALPHA_RESPONSE	61	-0.247063	-0.949451	0.565321	0.603166	1	619	tags=10%, list=6%, signal=10%		HALLMARK_SPERMATOGENESIS	HALLMARK_SPERMATOGENESIS	46	-0.235403	-0.850578	0.740234	0.812802	1	1997	tags=28%, list=21%, signal=36%		HALLMARK_WNT_BETA_CATENIN_SIGNALING	HALLMARK_WNT_BETA_CATENIN_SIGNALING	28	-0.288801	-0.900126	0.601336	0.716477	1	1772	tags=36%, list=18%, signal=44%
HALLMARK_PEROXISOME	HALLMARK_PEROXISOME	78	-0.195926	-0.808772	0.835404	0.836688	1	1848	tags=19%, list=19%, signal=23%		HALLMARK_OXIDATIVE_PHOSPHORYLATION	HALLMARK_OXIDATIVE_PHOSPHORYLATION	193	-0.162143	-0.760576	0.977591	0.922194	1	3063	tags=34%, list=31%, signal=48%		HALLMARK_MYC_TARGETS_V2	HALLMARK_MYC_TARGETS_V2	53	-0.181419	-0.668253	0.968992	0.978817	1	2007	tags=21%, list=21%, signal=26%		HALLMARK_OXIDATIVE_PHOSPHORYLATION	HALLMARK_OXIDATIVE_PHOSPHORYLATION	193	-0.179569	-0.796228	0.955	0.881433	1	966	tags=8%, list=10%, signal=8%
REACTOME_SENESCENCE_ASSOCIATED_SECRETORY_PHENOTYPE_SASP	REACTOME_SENESCENCE_ASSOCIATED_SECRETORY_PHENOTYPE_SASP	55	0.302663	1.24979	0.11358	0.244676	0.899	1125	tags=22%, list=11%, signal=24%		SENMAYO	SENMAYO	64	0.518763	1.96422	0	0.000856934	0.003	1310	tags=52%, list=13%, signal=59%		WP_NAD_METABOLISM_IN_ONCOGENEINDUCED_SENESCENCE_AND_MITOCHONDRIAL_DYSFUNCTIONASSOCIATED_SENESCENCE	WP_NAD_METABOLISM_IN_ONCOGENEINDUCED_SENESCENCE_AND_MITOCHONDRIAL_DYSFUNCTIONASSOCIATED_SENESCENCE	21	0.570519	1.71944	0.0101833	0.00422698	0.07	466	tags=33%, list=5%, signal=35%		TANG_SENESCENCE_TP53_TARGETS_DN	TANG_SENESCENCE_TP53_TARGETS_DN	45	0.837876	2.84605	0	0	0	163	tags=64%, list=2%, signal=65%
REACTOME_DNA_DAMAGE_TELOMERE_STRESS_INDUCED_SENESCENCE	REACTOME_DNA_DAMAGE_TELOMERE_STRESS_INDUCED_SENESCENCE	34	0.325367	1.2246	0.183623	0.24767	0.926	1139	tags=24%, list=11%, signal=26%		COPPE_SASP	COPPE_SASP	41	0.501551	1.75925	0.00177305	0.00541471	0.055	1929	tags=66%, list=20%, signal=82%		WP_PROSTAGLANDIN_AND_LEUKOTRIENE_METABOLISM_IN_SENESCENCE	WP_PROSTAGLANDIN_AND_LEUKOTRIENE_METABOLISM_IN_SENESCENCE	15	0.504226	1.39636	0.0969582	0.0633865	0.693	639	tags=20%, list=7%, signal=21%		CHICAS_RB1_TARGETS_SENESCENT	CHICAS_RB1_TARGETS_SENESCENT	387	0.449884	2.04977	0	0	0	1376	tags=35%, list=14%, signal=39%
REACTOME_CELLULAR_SENESCENCE	REACTOME_CELLULAR_SENESCENCE	129	0.227034	1.10425	0.208824	0.456944	0.997	1139	tags=18%, list=11%, signal=20%		FRIDMAN_SENESCENCE_UP	FRIDMAN_SENESCENCE_UP	57	0.451426	1.67873	0.005291	0.00876167	0.109	983	tags=37%, list=10%, signal=41%		WP_SPHINGOLIPID_METABOLISM_IN_SENESCENCE	WP_SPHINGOLIPID_METABOLISM_IN_SENESCENCE	19	0.46872	1.37267	0.111111	0.0719249	0.764	949	tags=21%, list=10%, signal=23%		KAMMINGA_SENESCENCE	KAMMINGA_SENESCENCE	27	0.559981	1.6949	0.00728597	0.0101375	0.086	2516	tags=52%, list=26%, signal=70%
WP_SPHINGOLIPID_METABOLISM_IN_SENESCENCE	WP_SPHINGOLIPID_METABOLISM_IN_SENESCENCE	20	0.339834	1.07673	0.350348	0.479465	0.998	866	tags=25%, list=9%, signal=27%		REACTOME_DNA_DAMAGE_TELOMERE_STRESS_INDUCED_SENESCENCE	REACTOME_DNA_DAMAGE_TELOMERE_STRESS_INDUCED_SENESCENCE	37	0.413614	1.40729	0.062963	0.0796761	0.756	798	tags=22%, list=8%, signal=23%		TANG_SENESCENCE_TP53_TARGETS_DN	TANG_SENESCENCE_TP53_TARGETS_DN	40	-0.657597	-2.26824	0	0	0	972	tags=55%, list=10%, signal=61%		REACTOME_SENESCENCE_ASSOCIATED_SECRETORY_PHENOTYPE_SASP	REACTOME_SENESCENCE_ASSOCIATED_SECRETORY_PHENOTYPE_SASP	54	0.41855	1.4582	0.0382514	0.0721893	0.588	774	tags=22%, list=8%, signal=24%
WP_NAD_METABOLISM_IN_ONCOGENEINDUCED_SENESCENCE_AND_MITOCHONDRIAL_DYSFUNCTIONASSOCIATED_SENESCENCE	WP_NAD_METABOLISM_IN_ONCOGENEINDUCED_SENESCENCE_AND_MITOCHONDRIAL_DYSFUNCTIONASSOCIATED_SENESCENCE	20	0.303657	0.963145	0.493088	0.763775	1	2480	tags=40%, list=25%, signal=53%		REACTOME_CELLULAR_SENESCENCE	REACTOME_CELLULAR_SENESCENCE	129	0.276371	1.17835	0.169841	0.278076	0.998	798	tags=14%, list=8%, signal=15%		REACTOME_CELLULAR_SENESCENCE	REACTOME_CELLULAR_SENESCENCE	145	-0.384367	-1.69928	0	0.00909699	0.078	2307	tags=36%, list=24%, signal=47%		REACTOME_CELLULAR_SENESCENCE	REACTOME_CELLULAR_SENESCENCE	126	0.354485	1.42276	0.0121739	0.0901358	0.689	2357	tags=37%, list=25%, signal=48%
REACTOME_OXIDATIVE_STRESS_INDUCED_SENESCENCE	REACTOME_OXIDATIVE_STRESS_INDUCED_SENESCENCE	66	0.222675	0.946379	0.578797	0.782439	1	936	tags=17%, list=9%, signal=18%		REACTOME_SENESCENCE_ASSOCIATED_SECRETORY_PHENOTYPE_SASP	REACTOME_SENESCENCE_ASSOCIATED_SECRETORY_PHENOTYPE_SASP	54	0.313638	1.14795	0.241739	0.320987	0.999	796	tags=15%, list=8%, signal=16%		REACTOME_OXIDATIVE_STRESS_INDUCED_SENESCENCE	REACTOME_OXIDATIVE_STRESS_INDUCED_SENESCENCE	85	-0.401655	-1.63644	0	0.0162641	0.149	2540	tags=40%, list=27%, signal=54%		SENMAYO	SENMAYO	60	0.378638	1.34207	0.0583942	0.148502	0.888	889	tags=30%, list=9%, signal=33%
REACTOME_ONCOGENE_INDUCED_SENESCENCE	REACTOME_ONCOGENE_INDUCED_SENESCENCE	31	0.231264	0.816581	0.738272	1	1	2816	tags=39%, list=28%, signal=54%		WP_PROSTAGLANDIN_AND_LEUKOTRIENE_METABOLISM_IN_SENESCENCE	WP_PROSTAGLANDIN_AND_LEUKOTRIENE_METABOLISM_IN_SENESCENCE	17	0.399659	1.11298	0.313076	0.366181	1	713	tags=24%, list=7%, signal=25%		REACTOME_DNA_DAMAGE_TELOMERE_STRESS_INDUCED_SENESCENCE	REACTOME_DNA_DAMAGE_TELOMERE_STRESS_INDUCED_SENESCENCE	55	-0.441244	-1.62822	0.00552486	0.0159315	0.158	2307	tags=45%, list=24%, signal=60%		WP_NAD_METABOLISM_IN_ONCOGENEINDUCED_SENESCENCE_AND_MITOCHONDRIAL_DYSFUNCTIONASSOCIATED_SENESCENCE	WP_NAD_METABOLISM_IN_ONCOGENEINDUCED_SENESCENCE_AND_MITOCHONDRIAL_DYSFUNCTIONASSOCIATED_SENESCENCE	20	0.46592	1.2959	0.132143	0.174544	0.957	2393	tags=55%, list=25%, signal=73%
HALLMARK_ALLOGRAFT_REJECTION	HALLMARK_ALLOGRAFT_REJECTION	77	0.18307	0.81139	0.861357	1	1	2650	tags=31%, list=27%, signal=42%		WP_NAD_METABOLISM_IN_ONCOGENEINDUCED_SENESCENCE_AND_MITOCHONDRIAL_DYSFUNCTIONASSOCIATED_SENESCENCE	WP_NAD_METABOLISM_IN_ONCOGENEINDUCED_SENESCENCE_AND_MITOCHONDRIAL_DYSFUNCTIONASSOCIATED_SENESCENCE	21	0.37651	1.11009	0.318182	0.360152	1	798	tags=24%, list=8%, signal=26%		CHICAS_RB1_TARGETS_SENESCENT	CHICAS_RB1_TARGETS_SENESCENT	361	-0.329407	-1.62441	0	0.0151875	0.161	2422	tags=37%, list=25%, signal=48%		GOBP_CELLULAR_SENESCENCE	GOBP_CELLULAR_SENESCENCE	60	0.36187	1.28351	0.113879	0.181151	0.969	995	tags=23%, list=10%, signal=26%
TANG_SENESCENCE_TP53_TARGETS_DN	TANG_SENESCENCE_TP53_TARGETS_DN	46	0.205131	0.807231	0.825521	0.991237	1	2710	tags=35%, list=27%, signal=48%		TANG_SENESCENCE_TP53_TARGETS_UP	TANG_SENESCENCE_TP53_TARGETS_UP	16	0.378358	1.05147	0.380497	0.435633	1	1093	tags=38%, list=11%, signal=42%		REACTOME_SENESCENCE_ASSOCIATED_SECRETORY_PHENOTYPE_SASP	REACTOME_SENESCENCE_ASSOCIATED_SECRETORY_PHENOTYPE_SASP	74	-0.367427	-1.46951	0.0164234	0.0522415	0.522	1461	tags=26%, list=15%, signal=30%		REACTOME_DNA_DAMAGE_TELOMERE_STRESS_INDUCED_SENESCENCE	REACTOME_DNA_DAMAGE_TELOMERE_STRESS_INDUCED_SENESCENCE	35	0.385804	1.23702	0.185792	0.228279	0.994	410	tags=23%, list=4%, signal=24%
WP_PROSTAGLANDIN_AND_LEUKOTRIENE_METABOLISM_IN_SENESCENCE	WP_PROSTAGLANDIN_AND_LEUKOTRIENE_METABOLISM_IN_SENESCENCE	16	0.267382	0.79955	0.721429	0.965977	1	1489	tags=25%, list=15%, signal=29%		KAMMINGA_SENESCENCE	KAMMINGA_SENESCENCE	28	0.323431	1.0308	0.396491	0.466405	1	3040	tags=39%, list=31%, signal=57%		GOBP_CELLULAR_SENESCENCE	GOBP_CELLULAR_SENESCENCE	59	-0.385174	-1.45663	0.0310078	0.0554096	0.566	1786	tags=32%, list=19%, signal=39%		COPPE_SASP	COPPE_SASP	38	0.346193	1.14233	0.269759	0.343655	0.998	889	tags=32%, list=9%, signal=35%
COPPE_SASP	COPPE_SASP	39	-0.537684	-1.92488	0	0.00196259	0.009	1628	tags=51%, list=16%, signal=61%		REACTOME_OXIDATIVE_STRESS_INDUCED_SENESCENCE	REACTOME_OXIDATIVE_STRESS_INDUCED_SENESCENCE	66	0.216696	0.821982	0.777193	0.859778	1	765	tags=12%, list=8%, signal=13%		SENMAYO	SENMAYO	54	-0.371613	-1.41708	0.0449219	0.0651909	0.682	1559	tags=24%, list=16%, signal=29%		REACTOME_OXIDATIVE_STRESS_INDUCED_SENESCENCE	REACTOME_OXIDATIVE_STRESS_INDUCED_SENESCENCE	67	0.228994	0.826403	0.784746	0.874239	1	1156	tags=18%, list=12%, signal=20%
FRIDMAN_SENESCENCE_UP	FRIDMAN_SENESCENCE_UP	59	-0.419957	-1.60446	0.00623053	0.0221305	0.278	1240	tags=31%, list=12%, signal=35%		GOBP_CELLULAR_SENESCENCE	GOBP_CELLULAR_SENESCENCE	60	0.214604	0.809257	0.791667	0.860121	1	353	tags=7%, list=4%, signal=7%		COPPE_SASP	COPPE_SASP	36	-0.398309	-1.35754	0.0732177	0.0970268	0.834	2485	tags=47%, list=26%, signal=64%		REACTOME_ONCOGENE_INDUCED_SENESCENCE	REACTOME_ONCOGENE_INDUCED_SENESCENCE	29	0.265935	0.816717	0.740351	0.86911	1	1960	tags=24%, list=20%, signal=30%
SENMAYO	SENMAYO	59	-0.37057	-1.43302	0.0362205	0.0639133	0.771	1576	tags=29%, list=16%, signal=34%		TANG_SENESCENCE_TP53_TARGETS_DN	TANG_SENESCENCE_TP53_TARGETS_DN	46	-0.557279	-2.12007	0	0	0	2167	tags=63%, list=22%, signal=81%		FRIDMAN_SENESCENCE_UP	FRIDMAN_SENESCENCE_UP	54	-0.345209	-1.29144	0.119643	0.138089	0.946	1481	tags=24%, list=15%, signal=28%		FRIDMAN_SENESCENCE_UP	FRIDMAN_SENESCENCE_UP	57	-0.594308	-2.14778	0	0	0	906	tags=32%, list=9%, signal=35%
CHICAS_RB1_TARGETS_SENESCENT	CHICAS_RB1_TARGETS_SENESCENT	404	-0.247492	-1.2458	0.043038	0.188651	0.993	1275	tags=17%, list=13%, signal=19%		CHICAS_RB1_TARGETS_SENESCENT	CHICAS_RB1_TARGETS_SENESCENT	393	-0.303197	-1.55905	0	0.0385075	0.253	2196	tags=39%, list=22%, signal=48%		REACTOME_ONCOGENE_INDUCED_SENESCENCE	REACTOME_ONCOGENE_INDUCED_SENESCENCE	28	-0.381664	-1.23937	0.184261	0.187058	0.976	2730	tags=43%, list=29%, signal=60%		WP_SPHINGOLIPID_METABOLISM_IN_SENESCENCE	WP_SPHINGOLIPID_METABOLISM_IN_SENESCENCE	21	-0.415164	-1.2435	0.178571	0.24439	0.961	991	tags=29%, list=10%, signal=32%
KAMMINGA_SENESCENCE	KAMMINGA_SENESCENCE	27	-0.336016	-1.09858	0.329966	0.360097	1	1285	tags=22%, list=13%, signal=25%		WP_SPHINGOLIPID_METABOLISM_IN_SENESCENCE	WP_SPHINGOLIPID_METABOLISM_IN_SENESCENCE	22	-0.315669	-0.988911	0.471783	0.550442	1	255	tags=14%, list=3%, signal=14%		HALLMARK_IL2_STAT5_SIGNALING	HALLMARK_IL2_STAT5_SIGNALING	113	-0.271651	-1.14752	0.2	0.316107	1	1210	tags=16%, list=13%, signal=18%		WP_PROSTAGLANDIN_AND_LEUKOTRIENE_METABOLISM_IN_SENESCENCE	WP_PROSTAGLANDIN_AND_LEUKOTRIENE_METABOLISM_IN_SENESCENCE	18	-0.354349	-0.987316	0.470588	0.61908	1	79	tags=11%, list=1%, signal=11%
GOBP_CELLULAR_SENESCENCE	GOBP_CELLULAR_SENESCENCE	61	-0.246862	-0.967325	0.521951	0.583175	1	603	tags=11%, list=6%, signal=12%		REACTOME_ONCOGENE_INDUCED_SENESCENCE	REACTOME_ONCOGENE_INDUCED_SENESCENCE	31	-0.273618	-0.9193	0.576577	0.660682	1	2224	tags=35%, list=23%, signal=46%		REACTOME_FORMATION_OF_SENESCENCE_ASSOCIATED_HETEROCHROMATIN_FOCI_SAHF	REACTOME_FORMATION_OF_SENESCENCE_ASSOCIATED_HETEROCHROMATIN_FOCI_SAHF	15	-0.41318	-1.14133	0.266533	0.314959	1	1449	tags=40%, list=15%, signal=47%		CHR1Q21.3.grp	CHR1Q21.3.grp	75	-0.279873	-1.0778	0.280872	0.280872	0.116	1830	tags=28%, list=19%, signal=34%
TANG_SENESCENCE_TP53_TARGETS_UP	TANG_SENESCENCE_TP53_TARGETS_UP	15	-0.293561	-0.820493	0.723729	0.830218	1	2023	tags=47%, list=20%, signal=58%		CHR1Q21.3.grp	CHR1Q21.3.grp	70	0.504158	1.92887	0	0	0	2252	tags=40%, list=23%, signal=52%		KAMMINGA_SENESCENCE	KAMMINGA_SENESCENCE	27	-0.276445	-0.892097	0.616123	0.764344	1	2156	tags=33%, list=23%, signal=43%
CHR1Q21.3.grp	CHR1Q21.3.grp	66	0.460178	1.94541	0	0	0	1722	tags=35%, list=17%, signal=42%													CHR1Q21.3.grp	CHR1Q21.3.grp	78	0.270006	1.10197	0.273731	0.273731	0.124	2465	tags=38%, list=26%, signal=51%
