# Supplementary material for: Loss of ANCO1 Expression Regulates Chromatin Accessibility and Drives Progression of Early-Stage Triple-Negative Breast Cancer
Source: Int J Mol Sci. 2023 Jul 15;24(14):11505. doi: 10.3390/ijms241411505 (PMC10380654; doi:10.3390/ijms241411505)
Supplement: Supplementary file 1 [file ijms-24-11505-s001.zip › Supplementary Table S7.xlsx]

## Sheet: Sheet1
IPA results of up-regulated genes (Log2FC > 1.2) with increased H3K27Ac engagement in 10A and DCIS shANCO1 cells
10A								DCIS
Ingenuity Canonical Pathways	-log(p-value)	Ratio	Molecules					Ingenuity Canonical Pathways	-log(p-value)	Ratio	Molecules
Glucocorticoid Receptor Signaling	4.03	0.0103	IL1A,IL1B,KRT15,KRT6B,KRT80,PLAU					Wound Healing Signaling Pathway	10.1	0.0516	COL17A1,CXCL8,IL1A,IL1B,ITGB1,KRT6A,LAMA3,LAMB3,LAMC2,PDGFB,RRAS,TGFA,VEGFC
CDX Gastrointestinal Cancer Signaling Pathway	3.87	0.0198	HBEGF,IL1A,IL1B,WNT9A					Pulmonary Fibrosis Idiopathic Signaling Pathway	7.69	0.0368	AREG,COL17A1,IL1B,ITGA2,ITGB1,ITGB6,PDGFB,PLAU,RRAS,SERPINE1,TGFA,WNT9A
Wound Healing Signaling Pathway	3.51	0.0159	HBEGF,IL1A,IL1B,KRT6B					Hepatic Fibrosis / Hepatic Stellate Cell Activation	6.72	0.0464	COL17A1,CXCL3,CXCL8,IL1A,IL1B,PDGFB,SERPINE1,TGFA,VEGFC
Differential Regulation of Cytokine Production in Intestinal Epithelial Cells by IL-17A and IL-17F	3.39	0.087	IL1A,IL1B					Myelination Signaling Pathway	6.69	0.0336	HDAC9,ITGA2,ITGB1,ITGB6,LAMA3,LAMB3,LAMC2,NDRG1,PDGFB,RRAS,WNT9A
S100 Family Signaling Pathway	3.37	0.00777	EREG,HBEGF,IL1B,S100A2,S100P,WNT9A					Hepatic Fibrosis Signaling Pathway	6.46	0.0284	CXCL8,IL1A,IL1B,IRAK2,ITGA2,ITGB1,ITGB6,PDGFB,RRAS,SERPINE1,VEGFC,WNT9A
Role Of Chondrocytes In Rheumatoid Arthritis Signaling Pathway	3.09	0.0213	IL1A,IL1B,PLAU					HER-2 Signaling in Breast Cancer	5.14	0.0352	AREG,CDKN1A,ETS1,IL1A,ITGB1,ITGB6,RRAS,TGFA
Tumor Microenvironment Pathway	2.79	0.0168	CD274,IL1B,PLAU					CDK5 Signaling	4.93	0.0522	ITGA2,ITGB1,LAMA3,LAMB3,LAMC2,RRAS
Granulocyte Adhesion and Diapedesis	2.72	0.0159	CLDN7,IL1A,IL1B					Neuregulin Signaling	4.89	0.0513	AREG,ITGA2,ITGB1,ITGB6,RRAS,TGFA
Role of Cytokines in Mediating Communication between Immune Cells	2.65	0.037	IL1A,IL1B					HGF Signaling	4.59	0.0455	CDKN1A,ETS1,ITGA2,ITGB1,ITGB6,RRAS
Agranulocyte Adhesion and Diapedesis	2.59	0.0143	CLDN7,IL1A,IL1B					STAT3 Pathway	4.54	0.0444	CDKN1A,IL1A,IL1B,PDGFB,RRAS,TGFA
Multiple Sclerosis Signaling Pathway	2.52	0.0135	IL1A,IL1B,PLAU					Ephrin Receptor Signaling	4.51	0.0347	EPHB2,ITGA2,ITGB1,ITGB6,PDGFB,RRAS,VEGFC
Role of Osteoblasts, Osteoclasts and Chondrocytes in Rheumatoid Arthritis	2.49	0.0132	IL1A,IL1B,WNT9A					Role of Tissue Factor in Cancer	4.44	0.0338	CXCL8,F3,IL1B,ITGB1,RRAS,TGFA,VEGFC
Role Of Osteoblasts In Rheumatoid Arthritis Signaling Pathway	2.41	0.0123	IL1A,IL1B,WNT9A					Clathrin-mediated Endocytosis Signaling	4.43	0.0337	EPHB2,ITGB1,ITGB6,PDGFB,SH3KBP1,STON2,VEGFC
Toll-like Receptor Signaling	2.33	0.0256	IL1A,IL1B					Role Of Chondrocytes In Rheumatoid Arthritis Signaling Pathway	4.43	0.0426	CXCL8,IL1A,IL1B,ITGB1,PLAU,VEGFC
Role of Hypercytokinemia/hyperchemokinemia in the Pathogenesis of Influenza	2.25	0.0233	IL1A,IL1B					Role of Hypercytokinemia/hyperchemokinemia in the Pathogenesis of Influenza	4.41	0.0581	AREG,CXCL3,CXCL8,IL1A,IL1B
Xenobiotic Metabolism AHR Signaling Pathway	2.24	0.023	IL1A,IL1B					Senescence Pathway	4.28	0.0268	ATF3,CDKN1A,CXCL8,ETS1,GADD45A,IL1A,RRAS,SERPINE1
Pyroptosis Signaling Pathway	2.18	0.0215	IL1A,IL1B					Multiple Sclerosis Signaling Pathway	4.25	0.0315	CXCL8,IL1A,IL1B,IRF1,NLRP1,PARP8,PLAU
ERBB Signaling	2.18	0.0215	EREG,HBEGF					p53 Signaling	4.14	0.051	CDKN1A,GADD45A,HDAC9,SFN,TP53I3
PPAR Signaling	2.07	0.0187	IL1A,IL1B					Role of Macrophages, Fibroblasts and Endothelial Cells in Rheumatoid Arthritis	3.97	0.0241	CXCL8,IL1A,IL1B,IRAK2,PDGFB,RRAS,VEGFC,WNT9A
Pulmonary Fibrosis Idiopathic Signaling Pathway	2.06	0.0092	IL1B,PLAU,WNT9A					Tumor Microenvironment Pathway	3.86	0.0335	CXCL8,IL1B,PDGFB,PLAU,RRAS,VEGFC
Role of Macrophages, Fibroblasts and Endothelial Cells in Rheumatoid Arthritis	2.04	0.00904	IL1A,IL1B,WNT9A					Bladder Cancer Signaling	3.8	0.0431	CDKN1A,CXCL8,HDAC9,RRAS,VEGFC
Neuregulin Signaling	1.99	0.0171	EREG,HBEGF					Molecular Mechanisms of Cancer	3.79	0.02	ARHGEF3,BIRC3,CDKN1A,HDAC9,ITGA2,ITGB1,ITGB6,RRAS,WNT9A
Airway Pathology in Chronic Obstructive Pulmonary Disease	1.98	0.0169	IL1A,IL1B					PAK Signaling	3.78	0.0427	ITGA2,ITGB1,ITGB6,PDGFB,RRAS
Cholecystokinin/Gastrin-mediated Signaling	1.98	0.0168	IL1A,IL1B					Virus Entry via Endocytic Pathways	3.76	0.0424	FLNB,ITGA2,ITGB1,ITGB6,RRAS
p38 MAPK Signaling	1.97	0.0167	IL1A,IL1B					IL-17 Signaling	3.75	0.0321	CXCL3,CXCL8,IL1A,IL1B,RRAS,VEGFC
LXR/RXR Activation	1.95	0.0163	IL1A,IL1B					Granulocyte Adhesion and Diapedesis	3.73	0.0317	CXCL3,CXCL8,HRH1,IL1A,IL1B,ITGB1
FXR/RXR Activation	1.93	0.0159	IL1A,IL1B					Glioma Signaling	3.65	0.04	CDKN1A,HDAC9,PDGFB,RRAS,TGFA
IL-6 Signaling	1.91	0.0155	IL1A,IL1B					Pancreatic Adenocarcinoma Signaling	3.63	0.0397	CDKN1A,HDAC9,PLD5,TGFA,VEGFC
Atherosclerosis Signaling	1.89	0.015	IL1A,IL1B					PI3K/AKT Signaling	3.6	0.03	CDKN1A,ITGA2,ITGB1,ITGB6,RRAS,SFN
STAT3 Pathway	1.87	0.0148	IL1A,IL1B					Atherosclerosis Signaling	3.52	0.0376	CXCL8,F3,IL1A,IL1B,PDGFB
IL-10 Signaling	1.76	0.013	IL1A,IL1B					HIF1Œ± Signaling	3.5	0.0288	CDKN1A,PDGFB,RRAS,SERPINE1,TGFA,VEGFC
Hepatic Fibrosis Signaling Pathway	1.76	0.00709	IL1A,IL1B,WNT9A					Agranulocyte Adhesion and Diapedesis	3.48	0.0286	CXCL3,CXCL8,HRH1,IL1A,IL1B,ITGB1
Role of Pattern Recognition Receptors in Recognition of Bacteria and Viruses	1.75	0.0128	IL1A,IL1B					Caveolar-mediated Endocytosis Signaling	3.48	0.0533	FLNB,ITGA2,ITGB1,ITGB6
RAR Activation	1.74	0.00701	IL1A,IL1B,PLAU					Role of PKR in Interferon Induction and Antiviral Response	3.48	0.0368	ATF3,IL1B,IRF1,NLRP1,PDGFB
Aryl Hydrocarbon Receptor Signaling	1.74	0.0126	IL1A,IL1B					Macropinocytosis Signaling	3.46	0.0526	ITGB1,ITGB6,PDGFB,RRAS
HMGB1 Signaling	1.7	0.012	IL1A,IL1B					TREM1 Signaling	3.43	0.0519	CXCL3,CXCL8,IL1B,ITGB1
Erythropoietin Signaling Pathway	1.65	0.0113	IL1A,IL1B					MSP-RON Signaling In Cancer Cells Pathway	3.42	0.0357	ETS1,ITGB1,RRAS,SFN,VEGFC
Differential Regulation of Cytokine Production in Macrophages and T Helper Cells by IL-17A and IL-17F	1.63	0.0556	IL1B					Activin Inhibin Signaling Pathway	3.41	0.0276	CDKN1A,FOSL1,FSTL3,IL1A,IL1B,SERPINE1
Acute Phase Response Signaling	1.62	0.0108	IL1A,IL1B					Renal Cell Carcinoma Signaling	3.39	0.0506	ETS1,PDGFB,RRAS,TGFA
IL-33 Signaling Pathway	1.61	0.0108	IL1A,IL1B					Hereditary Breast Cancer Signaling	3.39	0.0352	CDKN1A,GADD45A,HDAC9,RRAS,SFN
IL-17 Signaling	1.61	0.0107	IL1A,IL1B					Axonal Guidance Signaling	3.39	0.0176	ADAMTS6,EPHB2,ITGA2,ITGB1,ITGB6,PDGFB,RRAS,VEGFC,WNT9A
Macrophage Classical Activation Signaling Pathway	1.6	0.0106	IL1A,IL1B					Coagulation System	3.32	0.0857	F3,PLAU,SERPINE1
Macrophage Alternative Activation Signaling Pathway	1.6	0.0106	IL1A,IL1B					NAD Signaling Pathway	3.27	0.0331	NMNAT2,NT5E,PARP8,PDGFB,TGFA
NOD1/2 Signaling Pathway	1.6	0.0106	IL1A,IL1B					PTEN Signaling	3.27	0.0331	CDKN1A,ITGA2,ITGB1,ITGB6,RRAS
Hepatic Cholestasis	1.59	0.0105	IL1A,IL1B					Osteoarthritis Pathway	3.21	0.0254	CXCL8,IL1B,ITGA2,ITGB1,ITGB6,VEGFC
Inflammasome pathway	1.59	0.05	IL1B					Cardiac Hypertrophy Signaling (Enhanced)	3.2	0.0166	CXCL8,HDAC9,IL1A,IL1B,ITGA2,ITGB1,ITGB6,RRAS,WNT9A
Hepatic Fibrosis / Hepatic Stellate Cell Activation	1.58	0.0103	IL1A,IL1B					Regulation of Cellular Mechanics by Calpain Protease	3.18	0.0444	ITGA2,ITGB1,ITGB6,RRAS
Pulmonary Healing Signaling Pathway	1.56	0.0101	HBEGF,WNT9A					Role Of Osteoblasts In Rheumatoid Arthritis Signaling Pathway	3.14	0.0246	CTSV,CXCL8,IL1A,IL1B,VEGFC,WNT9A
Adrenomedullin signaling pathway	1.56	0.0101	IL1A,IL1B					Pyroptosis Signaling Pathway	3.12	0.043	GBP3,IL1A,IL1B,NLRP1
Role of Tissue Factor in Cancer	1.53	0.00966	HBEGF,IL1B					Actin Nucleation by ARP-WASP Complex	3.12	0.043	ITGA2,ITGB1,ITGB6,RRAS
Activin Inhibin Signaling Pathway	1.49	0.00922	IL1A,IL1B					HMGB1 Signaling	3.07	0.0299	CXCL8,IL1A,IL1B,RRAS,SERPINE1
Cardiac Hypertrophy Signaling (Enhanced)	1.48	0.00554	IL1A,IL1B,WNT9A					Glucocorticoid Receptor Signaling	2.98	0.0155	CDKN1A,CXCL3,CXCL8,IL1A,IL1B,KRT6A,PLAU,RRAS,SERPINE1
HER-2 Signaling in Breast Cancer	1.45	0.00881	HBEGF,IL1A					Erythropoietin Signaling Pathway	2.96	0.0282	BIRC3,CXCL8,IL1A,IL1B,RRAS
CDP-diacylglycerol Biosynthesis I	1.44	0.0357	GPAT3					Pathogen Induced Cytokine Storm Signaling Pathway	2.9	0.0189	COL17A1,CXCL3,CXCL8,IL1A,IL1B,IRF1,VEGFC
Phosphatidylglycerol Biosynthesis II (Non-plastidic)	1.41	0.0333	GPAT3					Paxillin Signaling	2.9	0.0374	ITGA2,ITGB1,ITGB6,RRAS
LPS/IL-1 Mediated Inhibition of RXR Function	1.36	0.00784	IL1A,IL1B					PPAR Signaling	2.9	0.0374	IL1A,IL1B,PDGFB,RRAS
Coagulation System	1.35	0.0286	PLAU					Telomerase Signaling	2.88	0.037	CDKN1A,ETS1,HDAC9,RRAS
Docosahexaenoic Acid (DHA) Signaling	1.31	0.0263	IL1B					Cell Cycle: G2/M DNA Damage Checkpoint Regulation	2.86	0.06	CDKN1A,GADD45A,SFN
								Role of IL-17A in Psoriasis	2.78	0.143	CXCL3,CXCL8
								Role of Cytokines in Mediating Communication between Immune Cells	2.76	0.0556	CXCL8,IL1A,IL1B
								Airway Pathology in Chronic Obstructive Pulmonary Disease	2.74	0.0339	CXCL3,CXCL8,IL1A,IL1B
								ID1 Signaling Pathway	2.71	0.0249	ATF3,CDKN1A,ETS1,RRAS,VEGFC
								GADD45 Signaling	2.63	0.05	CDKN1A,GADD45A,IL1B
								IL-8 Signaling	2.63	0.0238	CXCL8,IRAK2,PLD5,RRAS,VEGFC
								GP6 Signaling Pathway	2.62	0.0315	COL17A1,LAMA3,LAMB3,LAMC2
								Integrin Signaling	2.61	0.0236	ITGA2,ITGB1,ITGB6,PDGFB,RRAS
								IL-6 Signaling	2.6	0.031	CXCL8,IL1A,IL1B,RRAS
								ERK/MAPK Signaling	2.59	0.0233	ETS1,ITGA2,ITGB1,ITGB6,RRAS
								RHOGDI Signaling	2.54	0.0227	ARHGEF3,CDH13,ITGA2,ITGB1,ITGB6
								RAC Signaling	2.51	0.0292	ITGA2,ITGB1,ITGB6,RRAS
								Inflammasome pathway	2.46	0.1	IL1B,NLRP1
								ERK5 Signaling	2.37	0.0405	FOSL1,RRAS,SFN
								Semaphorin Neuronal Repulsive Signaling Pathway	2.36	0.0267	ITGA2,ITGB1,ITGB6,RRAS
								Actin Cytoskeleton Signaling	2.35	0.0205	ITGA2,ITGB1,ITGB6,PDGFB,RRAS
								Differential Regulation of Cytokine Production in Intestinal Epithelial Cells by IL-17A and IL-17F	2.34	0.087	IL1A,IL1B
								NF-Œ∫B Activation by Viruses	2.31	0.0385	ITGA2,ITGB1,RRAS
								Toll-like Receptor Signaling	2.31	0.0385	IL1A,IL1B,IRAK2
								Ovarian Cancer Signaling	2.29	0.0253	HDAC9,RRAS,VEGFC,WNT9A
								BEX2 Signaling Pathway	2.25	0.0366	CDKN1A,ITGB6,VEGFC
								NAD Salvage Pathway II	2.21	0.0741	NMNAT2,NT5E
								Signaling by Rho Family GTPases	2.19	0.0187	ARHGEF3,CDH13,ITGA2,ITGB1,ITGB6
								S100 Family Signaling Pathway	2.17	0.0117	AREG,CDKN1A,CXCL8,HRH1,IL1B,IRAK2,TGFA,VEGFC,WNT9A
								Glioblastoma Multiforme Signaling	2.17	0.0234	CDKN1A,PDGFB,RRAS,WNT9A
								Chronic Myeloid Leukemia Signaling	2.12	0.018	CDKN1A,HDAC9,ITGB1,RRAS,WNT9A
								ABRA Signaling Pathway	2.11	0.0326	ITGB1,SMTN,VEGFC
								ERBB Signaling	2.1	0.0323	AREG,RRAS,TGFA
								Non-Small Cell Lung Cancer Signaling	2.09	0.0319	HDAC9,RRAS,TGFA
								Regulation of eIF4 and p70S6K Signaling	2.08	0.0221	ITGA2,ITGB1,ITGB6,RRAS
								Acute Phase Response Signaling	2.05	0.0216	IL1A,IL1B,RRAS,SERPINE1
								IL-33 Signaling Pathway	2.04	0.0215	AREG,CXCL8,IL1A,IL1B
								MicroRNA Biogenesis Signaling Pathway	2.03	0.0214	PDGFB,RRAS,TGFA,ZC3H12A
								VEGF Signaling	2.02	0.0303	RRAS,SFN,VEGFC
								Macrophage Classical Activation Signaling Pathway	2.02	0.0212	CXCL8,IL1A,IL1B,IRF1
								NOD1/2 Signaling Pathway	2.02	0.0212	BIRC3,CXCL8,IL1A,IL1B
								Hepatic Cholestasis	2	0.0209	CXCL8,IL1A,IL1B,IRAK2
								Regulation Of The Epithelial Mesenchymal Transition By Growth Factors Pathway	1.99	0.0208	ETS1,HMGA2,PDGFB,RRAS
								Regulation of the Epithelial-Mesenchymal Transition Pathway	1.97	0.0205	ETS1,HMGA2,RRAS,WNT9A
								RAR Activation	1.94	0.014	CDKN1A,CXCL8,IL1A,IL1B,PLAU,TNIP1
								Adrenomedullin signaling pathway	1.94	0.0201	IL1A,IL1B,KCNQ3,RRAS
								ILK Signaling	1.93	0.0199	FLNB,ITGB1,ITGB6,VEGFC
								CDX Gastrointestinal Cancer Signaling Pathway	1.92	0.0198	CXCL8,IL1A,IL1B,WNT9A
								Coronavirus Pathogenesis Pathway	1.9	0.0196	CXCL8,HDAC9,IL1B,SERPINE1
								Sertoli Cell-Sertoli Cell Junction Signaling	1.89	0.0194	ITGA2,ITGB1,ITGB6,RRAS
								Prostate Cancer Signaling	1.86	0.0263	CDKN1A,HDAC9,RRAS
								Regulation of Actin-based Motility by Rho	1.85	0.0261	ITGA2,ITGB1,ITGB6
								Oncostatin M Signaling	1.82	0.0465	PLAU,RRAS
								Cholecystokinin/Gastrin-mediated Signaling	1.81	0.0252	IL1A,IL1B,RRAS
								p38 MAPK Signaling	1.8	0.025	IL1A,IL1B,IRAK2
								Serotonin Receptor Signaling	1.76	0.0128	CXCL8,IL1B,ITGB1,KCNQ3,PLD5,RRAS
								DNA damage-induced 14-3-3œÉ Signaling	1.76	0.0435	CDKN1A,SFN
								Role of Osteoblasts, Osteoclasts and Chondrocytes in Rheumatoid Arthritis	1.74	0.0175	BIRC3,IL1A,IL1B,WNT9A
								Role of IL-17F in Allergic Inflammatory Airway Diseases	1.74	0.0426	CXCL8,IL1B
								iNOS Signaling	1.74	0.0426	IRAK2,IRF1
								Dermatan Sulfate Biosynthesis (Late Stages)	1.73	0.0417	CHST11,DSE
								Melanoma Signaling	1.69	0.04	CDKN1A,RRAS
								Ferroptosis Signaling Pathway	1.69	0.0227	ANGPTL4,CDKN1A,RRAS
								Role of IL-17A in Arthritis	1.59	0.0351	CXCL3,CXCL8
								NAD Biosynthesis III	1.59	0.167	NMNAT2
								Endocannabinoid Cancer Inhibition Pathway	1.57	0.0204	ATF3,CDKN1A,VEGFC
								Retinoic acid Mediated Apoptosis Signaling	1.54	0.0333	IRF1,PARP8
								Dermatan Sulfate Biosynthesis	1.53	0.0328	CHST11,DSE
								NAD Biosynthesis from 2-amino-3-carboxymuconate Semialdehyde	1.52	0.143	NMNAT2
								NAD Salvage Pathway III	1.52	0.143	NMNAT2
								IL-10 Signaling	1.52	0.0195	CDKN1A,IL1A,IL1B
								Role of JAK2 in Hormone-like Cytokine Signaling	1.52	0.0323	BIRC3,VEGFC
								Neutrophil Extracellular Trap Signaling Pathway	1.51	0.0125	COL17A1,CXCL8,IL1B,ITGA2,ITGB1
								Role of Pattern Recognition Receptors in Recognition of Bacteria and Viruses	1.5	0.0192	CXCL8,IL1A,IL1B
								Epithelial Adherens Junction Signaling	1.5	0.0191	FRMD6,RRAS,SFN
								Aryl Hydrocarbon Receptor Signaling	1.48	0.0189	CDKN1A,IL1A,IL1B
								HOTAIR Regulatory Pathway	1.46	0.0184	CDKN1A,IRF1,WNT9A
								Cell Cycle: G1/S Checkpoint Regulation	1.44	0.0294	CDKN1A,HDAC9
								CLEAR Signaling Pathway	1.43	0.014	PDGFB,RRAS,SFN,TGFA
								Agrin Interactions at Neuromuscular Junction	1.43	0.029	ITGB1,RRAS
								GM-CSF Signaling	1.42	0.0286	ETS1,RRAS
								Salvage Pathways of Pyrimidine Deoxyribonucleotides	1.41	0.111	CDA
								Germ Cell-Sertoli Cell Junction Signaling	1.41	0.0176	ITGA2,ITGB1,RRAS
								Xenobiotic Metabolism Signaling	1.4	0.0137	CHST11,IL1A,IL1B,RRAS
								Glioma Invasiveness Signaling	1.39	0.0274	PLAU,RRAS
								Angiopoietin Signaling	1.36	0.0263	RRAS,TNIP1
								GDNF Family Ligand-Receptor Interactions	1.36	0.0263	PDLIM7,RRAS
								Antiproliferative Role of Somatostatin Receptor 2	1.35	0.026	CDKN1A,RRAS
								VDR/RXR Activation	1.34	0.0256	CDKN1A,GADD45A
								Breast Cancer Regulation by Stathmin1	1.33	0.0101	ARHGEF3,HRH1,PDGFB,RRAS,TGFA,VEGFC
								Thyroid Cancer Signaling	1.33	0.0253	CXCL8,RRAS
								Role of JAK family kinases in IL-6-type Cytokine Signaling	1.33	0.0253	IRF1,VEGFC
								Role of MAPK Signaling in Inhibiting the Pathogenesis of Influenza	1.33	0.0253	CXCL8,IL1B
								Role Of Osteoclasts In Rheumatoid Arthritis Signaling Pathway	1.33	0.0129	BIRC3,COL17A1,IL1B,RRAS
								Role of BRCA1 in DNA Damage Response	1.32	0.025	CDKN1A,GADD45A
								JAK/STAT Signaling	1.3	0.0244	CDKN1A,RRAS
								Macrophage Alternative Activation Signaling Pathway	1.3	0.0159	IL1A,IL1B,ZC3H12A
