# Supplementary figures and images for: Loss of ANCO1 Expression Regulates Chromatin Accessibility and Drives Progression of Early-Stage Triple-Negative Breast Cancer
Source: MDPI journal article supplement (doi:10.3390/ijms241411505), 2023-07-15

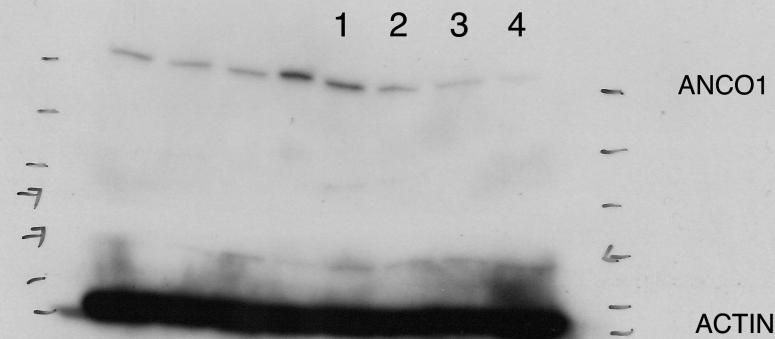

1. 10A\_shCTRL
2. 10A\_shANCO1 #1
3. 10A\_shANCO1 #2
4. 10A\_shANCO1 #3

[min 100]

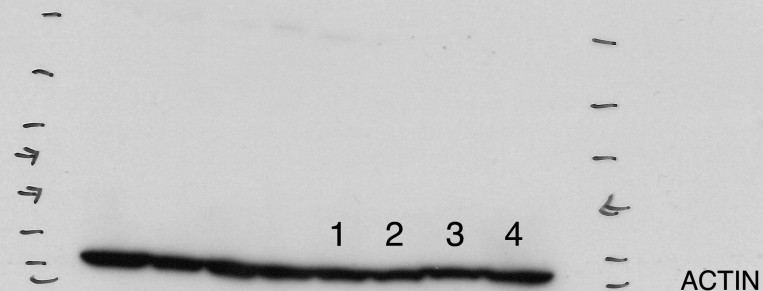

1. 10A\_shCTRL
2. 10A\_shANCO1 #1
3. 10A\_shANCO1 #2
4. 10A\_shANCO1 #3

35 (2)

Supplement: s1 [file s1]

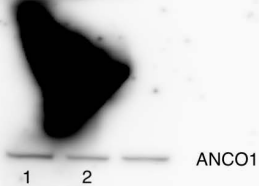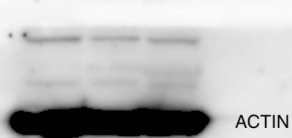

1: 10A\_shCTRL  
2: 10A\_shANCO1 #4

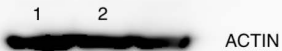

1: 10A\_shCTRL  
2: 10A\_shANCO1 #4

Supplement: s1 [file s1]
